# Supplementary material
Source: PubMed Central journal article supplement (PMC4291477)
Supplement: embj0034-0004-sd1.pdf [file embj0034-0004-sd1.pdf]

# Unfolded Protein Response-Induced ERdj3 Secretion Links ER Stress to Extracellular Proteostasis

Joseph C. Genereux, Song Qu, Minghai Zhou, Lisa M. Ryno, Shiyu Wang, Matthew D. Shoulders, Randal J. Kaufman, Corinne I. Lasmézas, Jeffery W. Kelly, and R. Luke Wiseman

| <b>Page</b> | <b>Contents</b>                |
|-------------|--------------------------------|
| S1          | <b>Table of Contents</b>       |
| S2–S6       | <b>Figure Legends</b>          |
| S7          | <b>Figure S1</b>               |
| S8          | <b>Figure S2</b>               |
| S9          | <b>Figure S3</b>               |
| S10         | <b>Figure S4</b>               |
| S11         | <b>Figure S5</b>               |
| S12         | <b>Figure S6</b>               |
| S13–<br>S16 | <b>Supplemental Methods</b>    |
| S17         | <b>Supplemental References</b> |

## SUPPLEMENTAL FIGURE LEGENDS

### Figure S1 (Supplement to Figure 1).

- A.** Representative immunoblot of media and lysates collected from HEK293T cells overexpressing ERdj3<sup>WT</sup> and treated with Brefeldin A (BFA, 100 ng/ml), as indicated. Cells were pretreated with BFA for 1 h, followed by 6 h conditioning of fresh media containing BFA.
- B.** Quantification of the fold change of ERdj3 in lysates and media collected from HEK293T cells overexpressing ERdj3<sup>WT</sup> and treated with the indicated concentration of BFA in fresh media as in **Figure S1A**. \*\* indicates a p-value < 0.01; (n = 3), \*\*\* indicates a p-value < 0.001; (n = 6).
- C.** Immunoblot of media and lysates collected from Huh7, HepG2, SH-SY5Y, HEK293T, and HeLa cells as indicated. In each case, 10<sup>5</sup> cells were seeded and allowed to attach overnight. Cells were then incubated in fresh media for 24 h prior to collection.
- D.** Immunoblot of media and lysates collected from Huh7 cells treated with the indicated concentration of Tg in fresh media for 16 h.
- E.** Immunoblot of sera collected from strain 129 mice with recombinant ERdj3 standard. The Ponceau S-stained blot is included as a loading control. The difference in mobility between <sup>R</sup>ERdj3 and endogenous murine ERdj3 is due to glycosylation of the latter.
- F.** Representative immunoblot of sera collected from mice fed a high fructose diet (60%) for the indicated period of time.
- G.** Quantification of immunoblots as described in **Figure S1F**. \*indicates a p-value < 0.05; n = 3 for each time-point.
- H.** Immunoblot of lysates of hepatic cells isolated from mice fed either a control or high fructose diet for the indicated period of time.

### Figure S2 (Supplement to Figure 2)

- A.** qPCR analysis of *ERdj3* in HEK293<sup>DAX</sup> cells following XBP1s (induced by 1 µg/mL doxycycline for 6 h), ATF6 (activated by 10 µM TMP for 6 h), or XBP1s/ATF6 activation. The increased expression following Tg treatment (1 µg/mL, 6 h) is shown as a control. Error bars represent the mean ± 95% confidence interval as calculated in DataAssist 2.0 (n = 3).

- B.** Total synthesized ERdj3 in HEK293<sup>DAX</sup> cells following XBP1s, ATF6, or XBP1s/ATF6 activation as determined by [<sup>35</sup>S] incorporation quantified from autoradiograms as shown in **Figure 2B**. Total synthesized ERdj3 at t = 0 h was normalized to the amount of [<sup>35</sup>S] labeled ERdj3 in vehicle-treated controls. \*indicates a p-value < 0.05; n = 3.
- C.** Immunoblot of lysates and media collected from HEK293<sup>DAX</sup> cells treated with TMP (10 μM to activate ATF6) and/or doxycycline (1 mg/mL to activate XBP1s) as indicated for 48 h. \*indicates a non-specific band detected by the HYOU1 antibody.
- D.** Immunoblot of lysates and media collected from HEK293<sup>DYG</sup> cells, a clonal control line allowing regulation of DHFR.YFP and GFP in an analogous manner to the HEK293<sup>DAX</sup> cell line (Shoulders et al, 2013), following 16 h of activation of GFP (by 1 μg/mL doxycycline) and/or DHFR.YFP (by 10 μM TMP), as indicated.
- E.** Immunoblot of ERdj3 in lysates and media collected from HepG2 cells following transduction with adenovirus carrying GFP, XBP1s, or ATF6 overexpression constructs, as indicated.

**Figure S3 (Supplement to Figure 3)**

- A.** qPCR of the UPR target genes *ERdj4* and *BiP* from HEK293T-Rex cells stably expressing tet-inducible ERdj3<sup>WT</sup> or ERdj3<sup>KDEL</sup>. Cell lines were pretreated with doxycycline (1 μg/mL, 16 h) to induce expression of tet-inducible ERdj3. Fresh media with doxycycline and Tg (1 μM, 6 h) was then added as indicated. Error bars represent the mean ± 95% confidence interval as calculated in DataAssist 2.0 (n = 3). A schematic showing the experimental protocol is shown above.
- B.** Bar graph quantifying cellular metabolic activity, as measured by resazurin fluorescence, of HEK293T-Rex cells stably expressing tet-inducible ERdj3<sup>WT</sup> or ERdj3<sup>KDEL</sup> following a 13 h Tg treatment at the indicated concentration. Cells were pre-treated with doxycycline (1 μg/mL, 5 h) to induce expression of tet-inducible ERdj3. Error bars represent s.e.m. (n = 4). A schematic showing the experimental protocol is shown above.
- C.** Far UV-vis circular dichroism spectrum of <sup>R</sup>ERdj3 at 8 μM in 50 mM K<sub>2</sub>HPO<sub>4</sub>/KH<sub>2</sub>PO<sub>4</sub>, pH 7.5, 300 mM KCl, 10 mM MgCl<sub>2</sub>, 10% glycerol.

- D. Quantification of ATP consumed by <sup>R</sup>BiP and <sup>R</sup>ERdj3 separately and in combination. <sup>R</sup>ERdj3 promotes a 1.7-fold increase in ATP consumption by <sup>R</sup>BiP, consistent with the reported value for ERdj3-dependent stimulation of BiP ATPase activity of 1.8-fold (Shen & Hendershot, 2005). Error bars show s.e.m. (n=3).
- E. Representative immunoblot of <sup>R</sup>ERdj3 affinity purified with quenched resin (QS), or native (N) or GdnHCl/DTT-denatured (D) RNase A covalently coupled to sepharose resin, indicating <sup>R</sup>ERdj3 selectively binds denatured proteins.
- F. Plot showing the time-dependent increase in ThioT fluorescence of Aβ<sub>1-40</sub> incubated (10 μM, 37 °C, pH 7.2) with regular agitation in the presence of native or denatured <sup>R</sup>ERdj3 (0.37 μM). <sup>R</sup>ERdj3 was denatured by boiling in the presence of 100 mM DTT for 5 min, as indicated. All traces represent the average of three replicates.

**Figure S4 (Supplement to Figure 4)**

- A. Representative immunoblot of conditioned media collected from HEK293T-Rex cells overexpressing ERdj3<sup>WT</sup>, non-silencing shRNA (NS) or *ERdj3* shRNA. These conditioned media were used for the experiments described in **Figure 4A-C** and **Figure S4B,C**.
- B. Representative images under 136X magnification of PK1 cells incubated with control conditioned media collected from HEK293T-Rex cells expressing either non-silencing shRNA (NS) or shRNA directed against *ERdj3* in the presence or absence of TPrP (600 ng/mL), as shown in **Figure 4A**. Insets show 544X magnification of a typical region of the image.
- C. Quantification of vacuole formation from images as shown in **Figure S4B**. Equal area images comprising ~1200 cells per well were counted for each sample. Counting of cells and of cells with identifiable vacuoles was done using the Fiji image processing package (Schindelin et al, 2012).  
\*\* indicates a p-value < 0.01 (n = 2).

**Figure S5 (Supplement to Figure 5)**

- A. Immunoblot of M2 anti-FLAG immunopurifications from media conditioned for 24 h on HEK293T cells overexpressing <sup>FT</sup>TTR<sup>WT</sup>, <sup>FT</sup>TTR<sup>A25T</sup>, and/or ERdj3<sup>WT</sup>, either as a co-incubation or co-expression as

described in **Figure 5A**. In these experiments, beads were washed in a less stringent 1% Triton X100, 50 mM Tris pH 7.5, 150 mM NaCl buffer prior to elution.

- B.** Representative immunoblot of M2 anti-FLAG immunopurifications from media conditioned for 24 h on SH-SY5Y cells overexpressing  $^{FT}TTR^{A25T}$  or  $^{FT}TTR^{WT}$  as indicated. Media inputs (1:300) are shown as a control.
- C.** Quantification of ERdj3 in M2 anti-FLAG immunopurifications from media conditioned for 24 h on SH-SY5Y cells overexpressing  $^{FT}TTR^{A25T}$  or  $^{FT}TTR^{WT}$ . ERdj3 levels were normalized to the mock transfection condition. \*\* indicates a p-value < 0.01 (n = 3).
- D.** Immunoblot of M2 anti-FLAG immunopurifications from media conditioned for 24 h on HepG2 cells overexpressing  $^{FT}TTR^{A25T}$  or  $^{FT}TTR^{WT}$  as indicated. Media input (1:400) are shown as a control.
- E.** Immunoblot of M1 anti-FLAG immunopurification from lysates harvested from HEK293T cells overexpressing  $^{FT}TTR^{D18G}$  and ERdj3. Cells were treated with the cell-permeable, reversible crosslinker DSP (1 mM) in PBS for 30 min at ambient temperature, quenched for 15 min with 100 mM Tris pH 8.0 prior to lysis to immortalize transient substrate-chaperone interactions. Lysate inputs (1:100) are shown as a control.
- F.** Immunoblot of M2 anti-FLAG immunopurifications from the conditioned media collected from HEK293T cells overexpressing  $^{FT}TTR^{WT}$ ,  $^{FT}TTR^{A25T}$ , and  $CLU^{3xHA}$  as indicated, either as a co-incubation or co-expression, in a similar manner as shown in **Figure 5A**. Beads were washed in RIPA buffer prior to elution. Media inputs (1:450) are shown as a control.
- G.** Immunoblot of M2 anti-FLAG immunopurifications from the conditioned media collected from HEK293T cells co-expressing  $^{FT}TTR^{D18G}$ , with Mock (GFP),  $CLU^{3xHA}$  or ERdj3 as indicated. Beads were washed in RIPA buffer prior to elution. Media inputs (1:450) are shown as a control.
- H.** qPCR analysis of *TTR* in HEK293T cells overexpressing  $^{FT}TTR^{D18G}$  with Mock (GFP),  $CLU^{3xHA}$  or ERdj3 as in **Figure S5G**. Error bars represent the mean  $\pm$  95% confidence interval as calculated in DataAssist 2.0 (n = 3).

**Figure S6 (supplement to Figure 6)**

- A.** Representative immunoblot of M2 anti-FLAG immunopurifications from media conditioned for 24 h on HEK293T-Rex cells overexpressing  $^{FT}TTR^{A25T}$  and treated with Tg at the indicated concentrations.
- B.** Bar graph depicting the quantified ratio of ERdj3 to  $^{FT}TTR$  in FLAG immunopurifications with Tg treatment, as in **Figure S6A**, normalized to the ERdj3/TTR ratio for the vehicle-treated condition. Error bars represent standard error from biological replicates. \* indicates a p-value < 0.05 (n = 3).
- C.** Immunoblot of lysate inputs (1:200), conditioned media inputs (1:2000) and M1 anti-FLAG immunopurification of media or lysates from HEK293T cells co-overexpressing  $^{FT}TTR^{A25T}$  and/or ERdj3<sup>WT</sup>, as indicated. Media was conditioned for 24 h prior to harvesting.
- D.** Representative immunoblot of M2 anti-FLAG immunopurification of media conditioned for 16 h on HEK293T cells co-overexpressing  $^{FT}TTR^{A25T}$  and CLU<sup>3xHA</sup>, with mock (GFP) or BiP, as indicated. Media inputs (1:450) are shown as a control. Lysates are also shown to confirm BiP overexpression.
- E.** Bar graph depicting the quantified ratio of CLU<sup>3xHA</sup> to  $^{FT}TTR$  in FLAG immunopurifications with BiP overexpression, as in **Figure S6C**, normalized to the CLU/TTR ratio for the mock-transfection condition. Error bars represent standard error from biological replicates (n = 3).

**FIGURE S1**

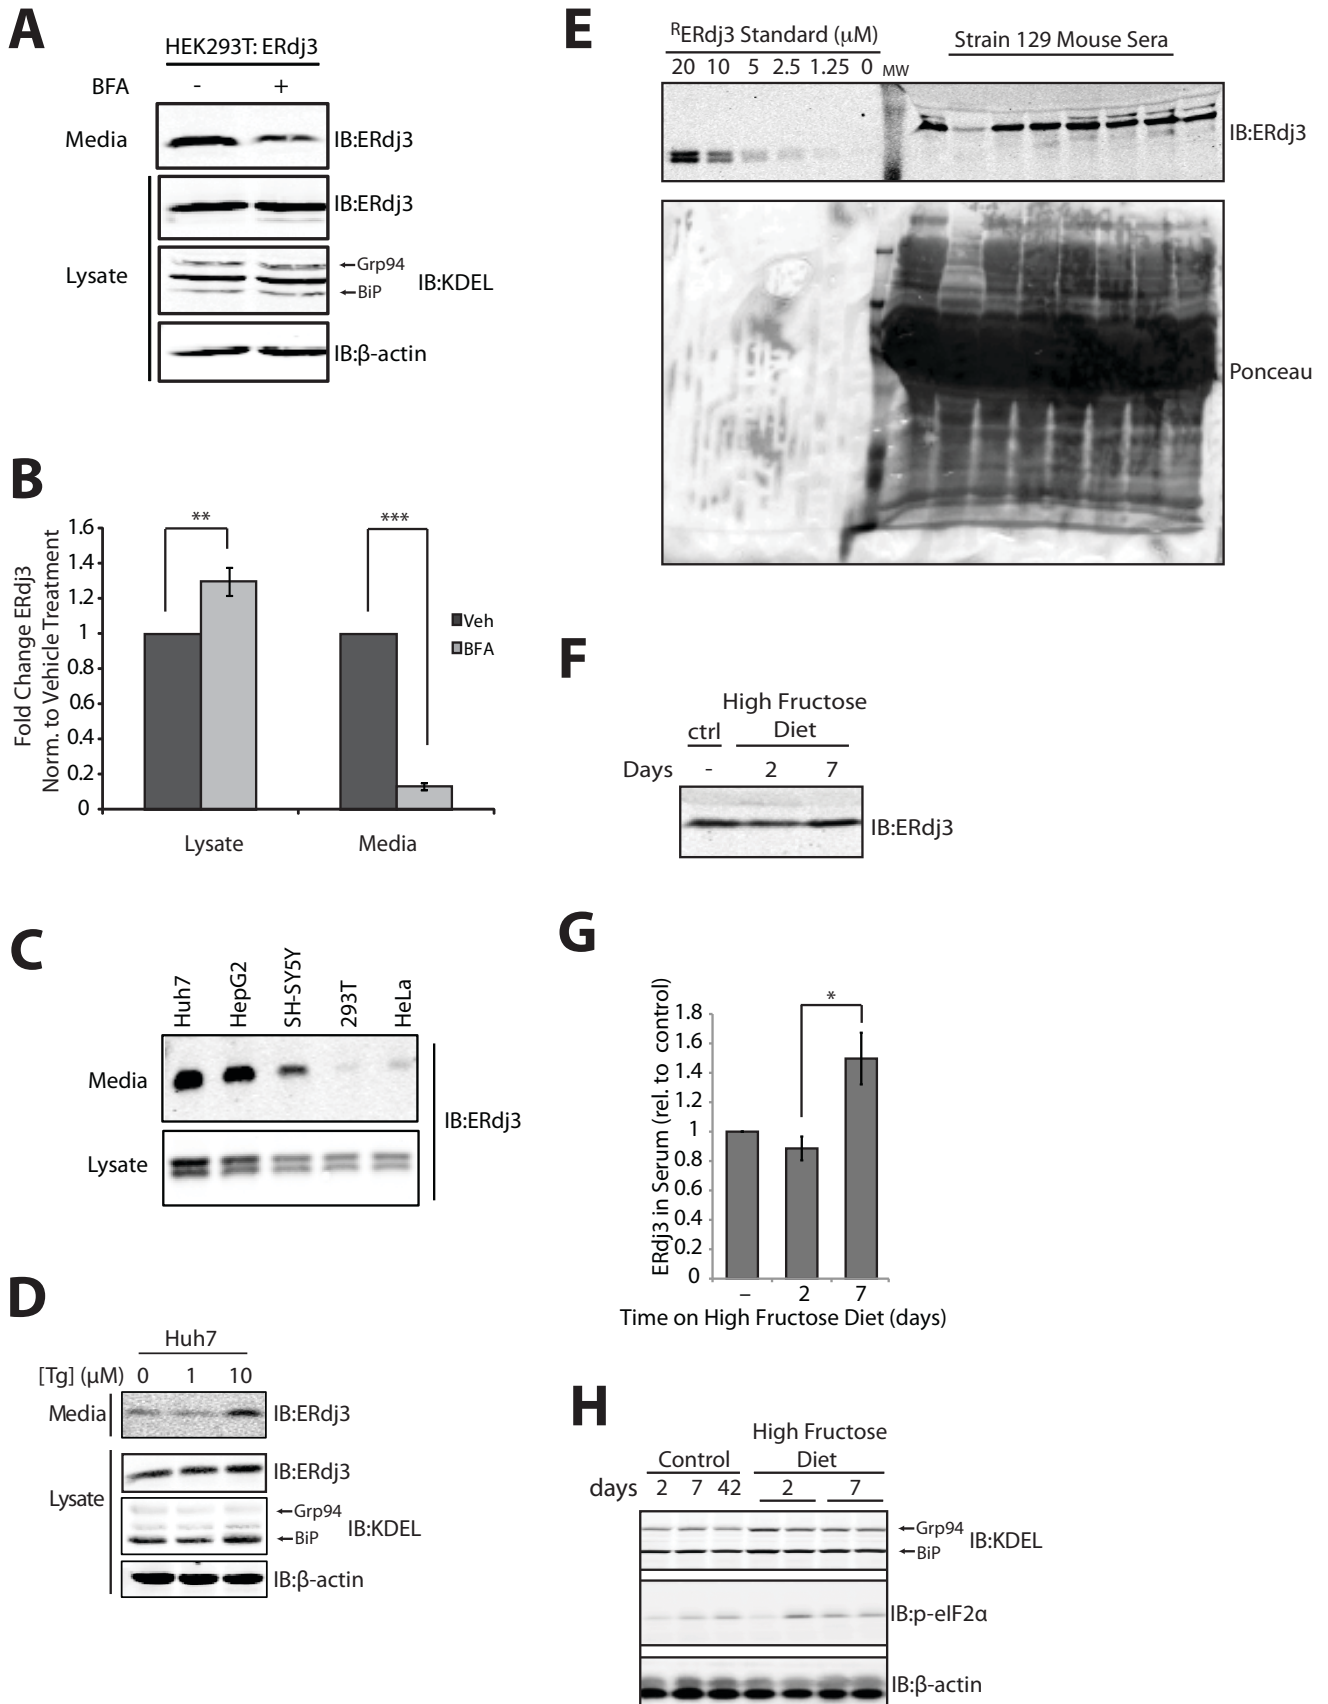

**FIGURE S2**

**A**

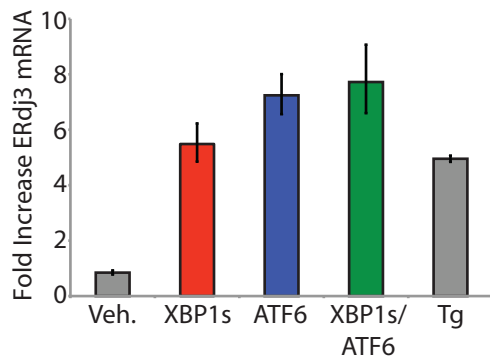

**B**

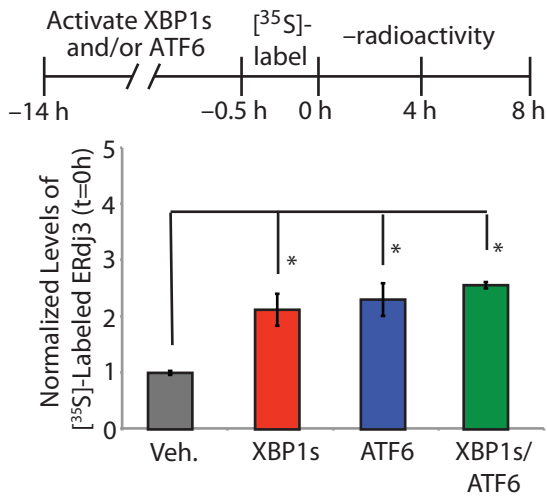

**C**

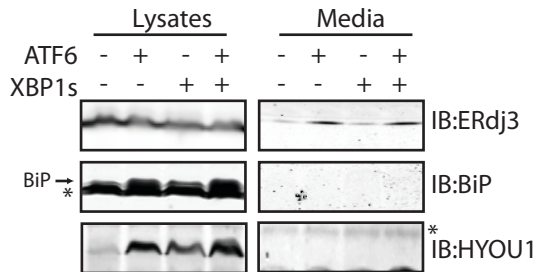

**D**

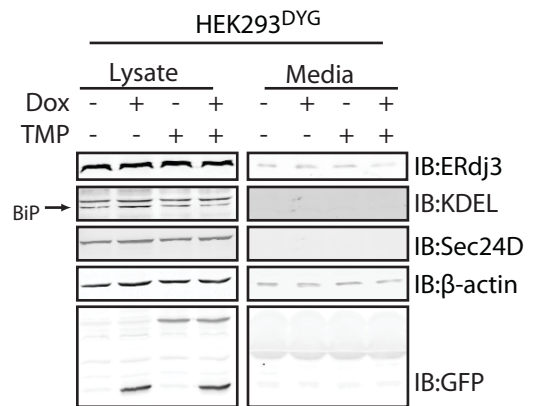

**E**

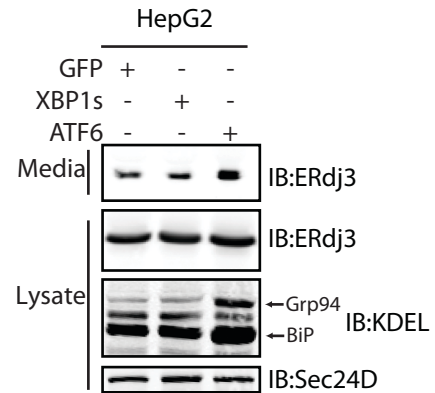



**FIGURE S3**

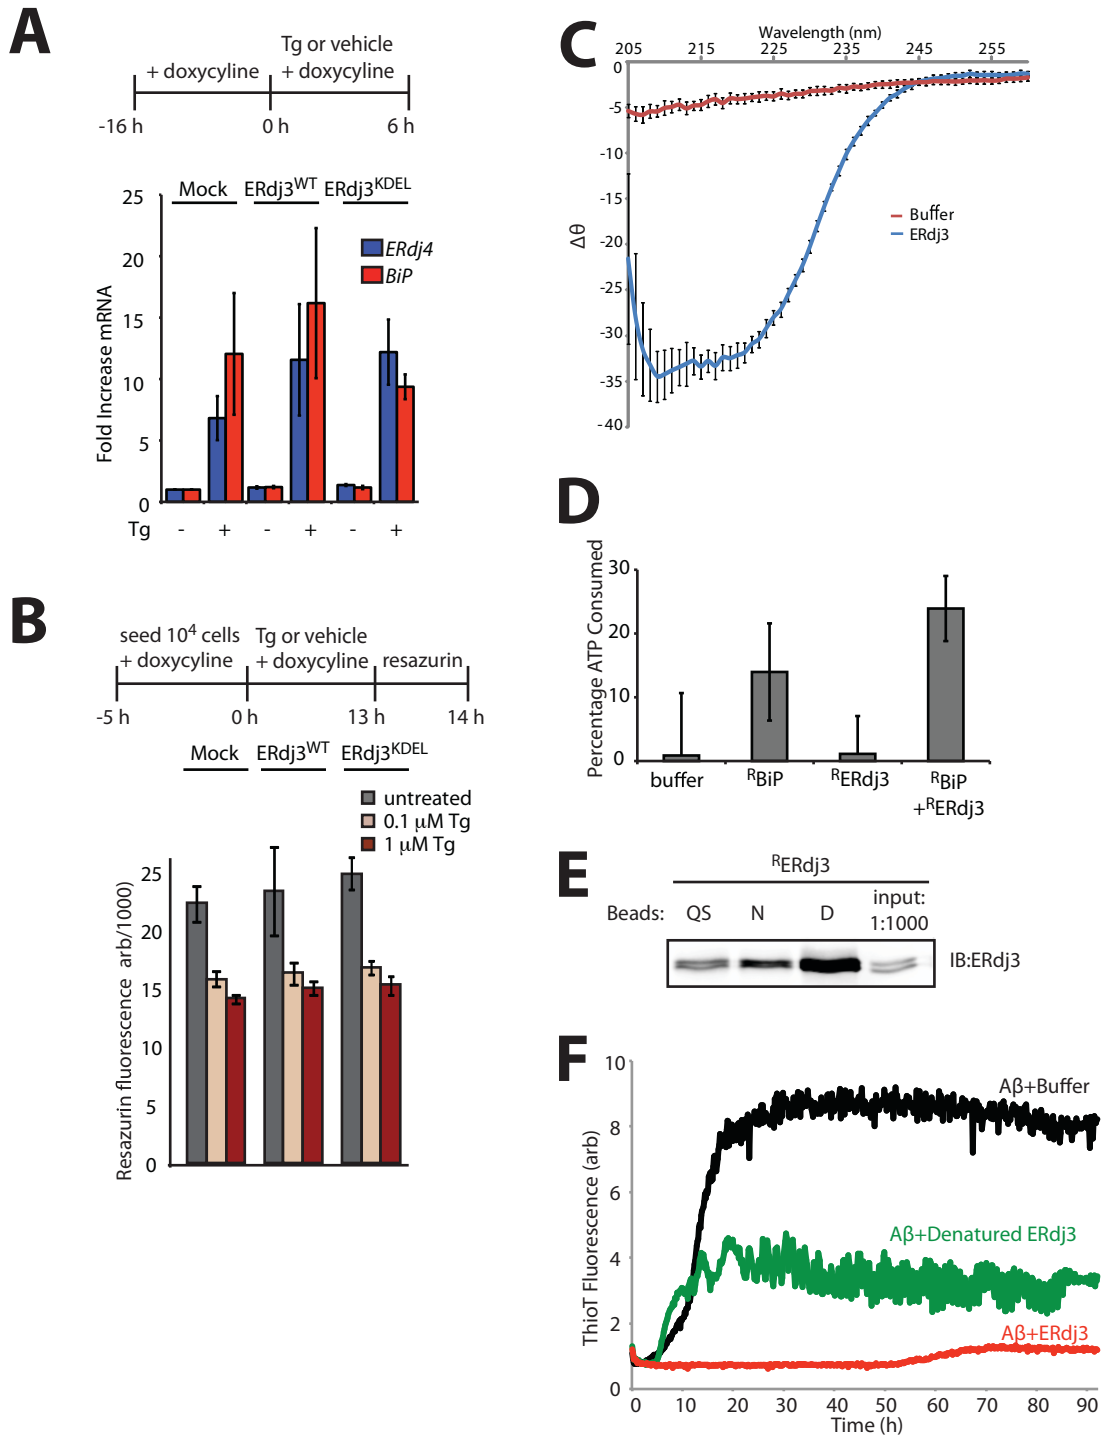

FIGURE S4

**A**

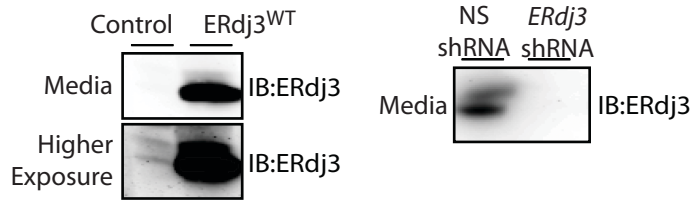

**B**

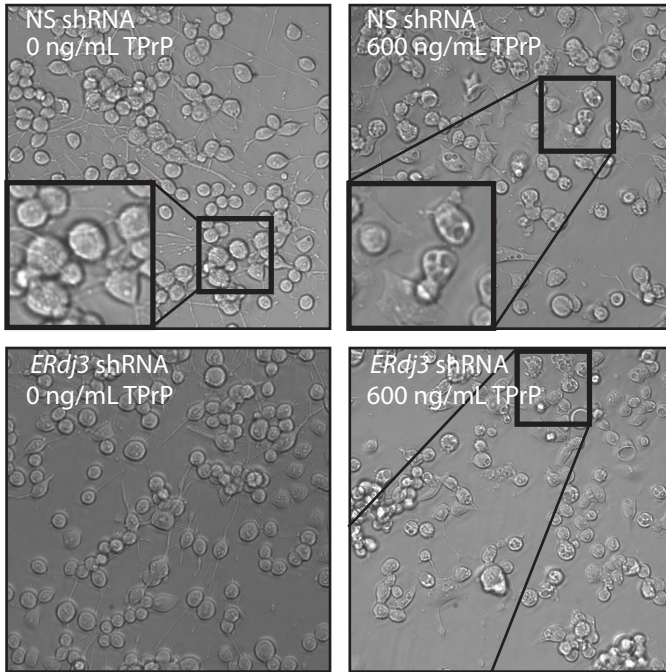

**C**

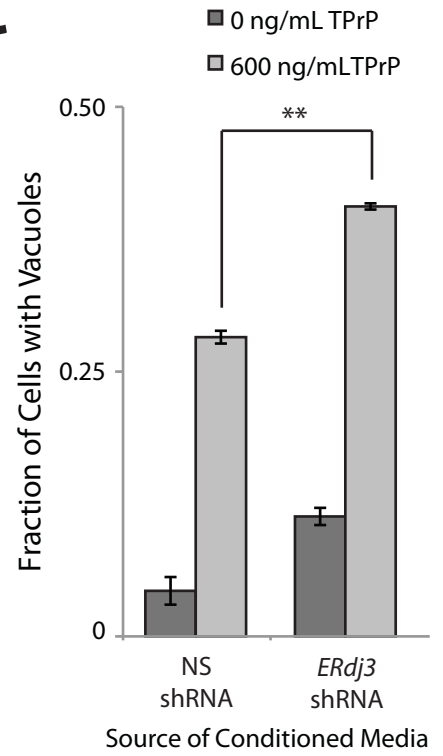

**FIGURE S5**

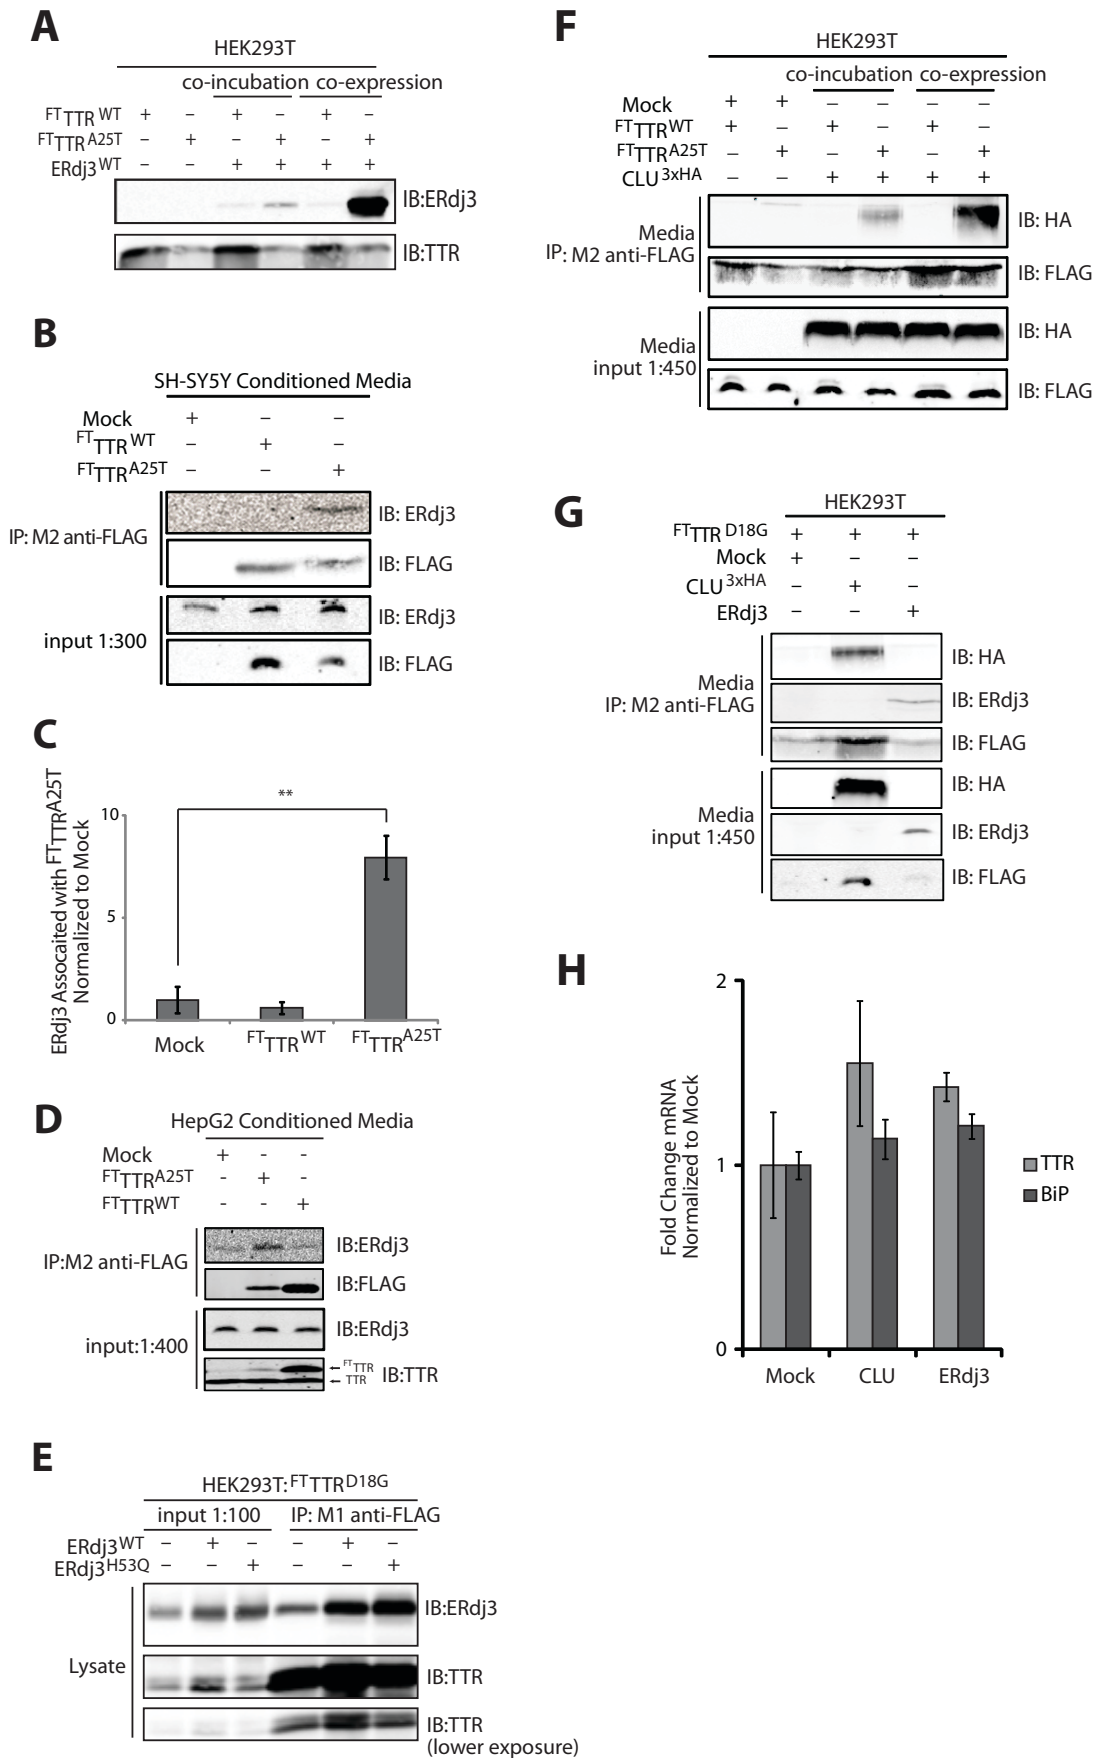

**FIGURE S6**

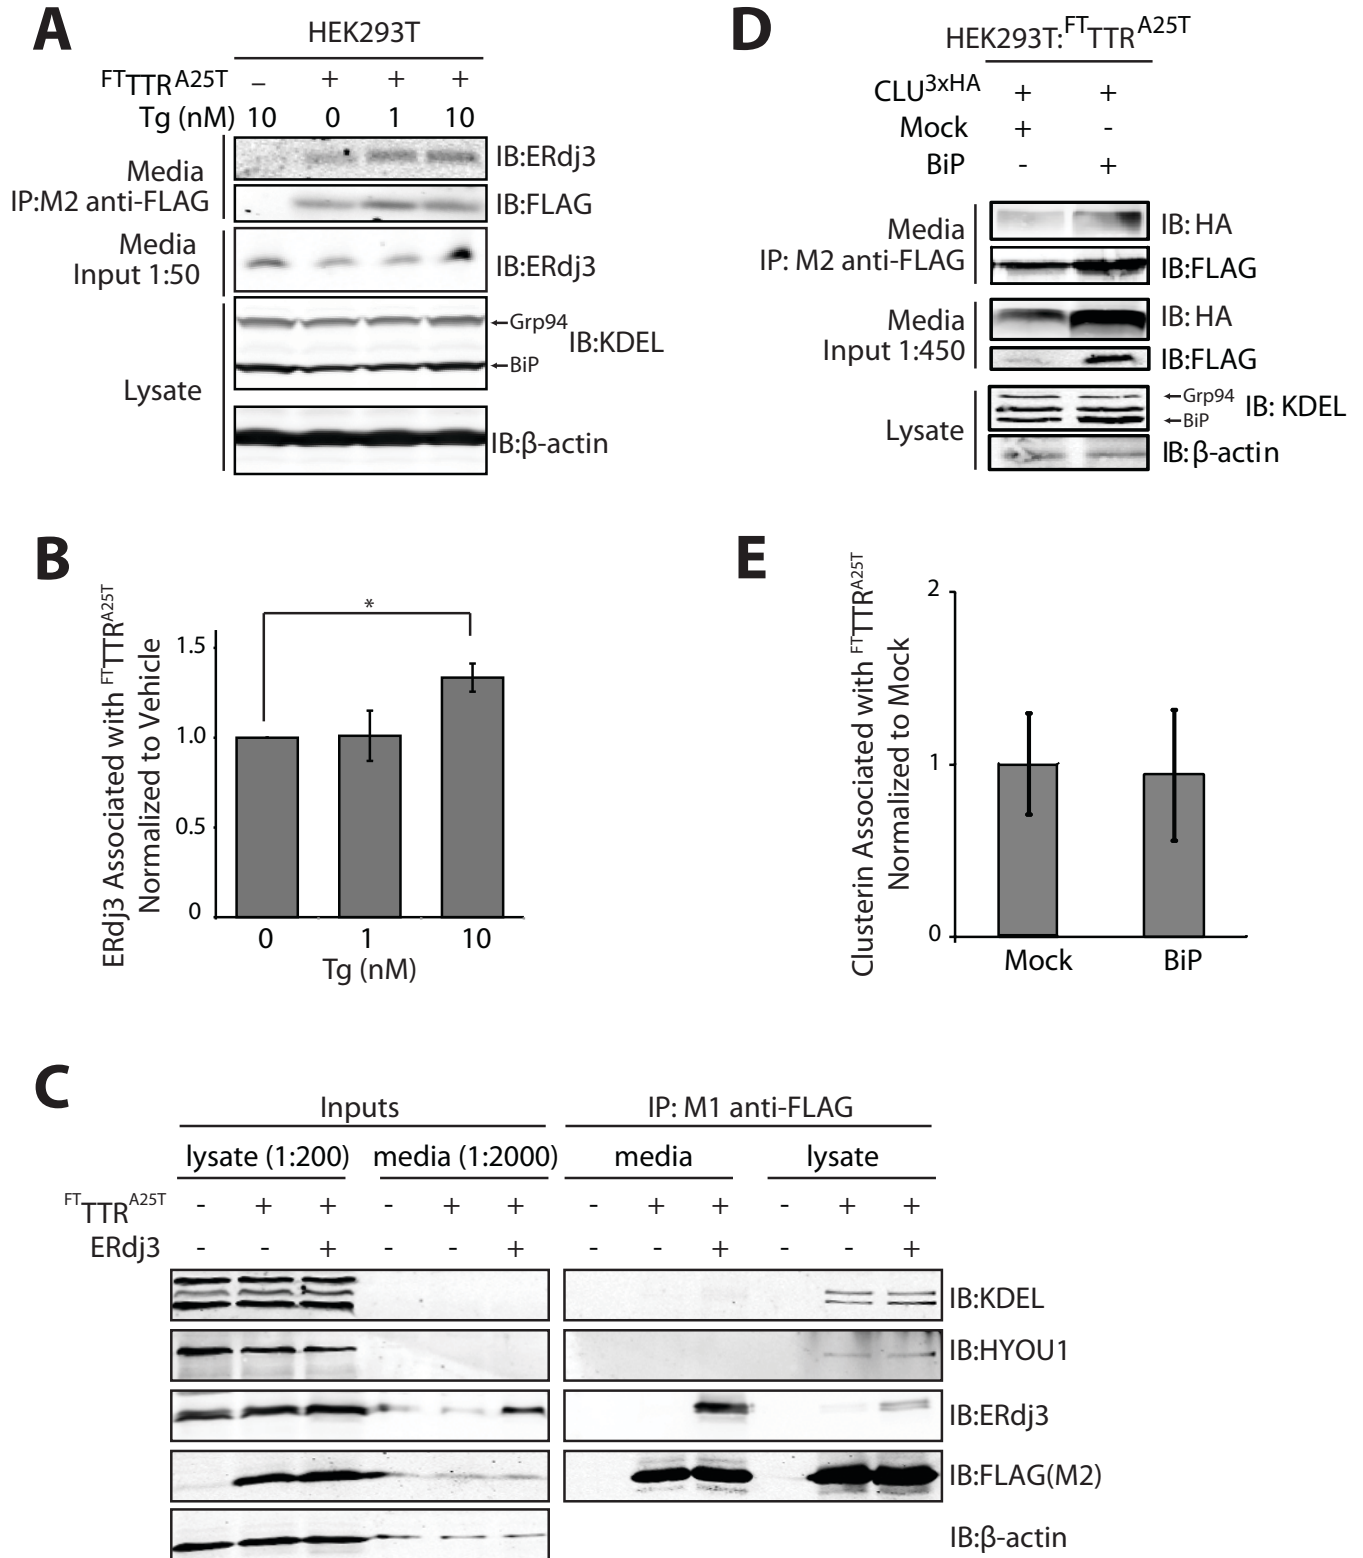

## SUPPLEMENTAL METHODS

### *Plasmid construction*

*ERdj3* was amplified from HEK293T cDNA with primers containing BamHI and EcoRI sites and cut into the pcDNA3.1(+) vector. A C-terminal KDEL was appended to ERdj3 using the reverse primer (IDT) 5'- ATG TTG AAT TCT ACA ACT CAT CTT TAT ATC CTT GCA GTC CAT TGT ATA CCT TCT G-3' and the EcoRI site. The ERdj3<sup>H53Q</sup> construct was generated by site-directed mutagenesis using the QuikChange site-directed mutagenesis kit (Stratagene, La Jolla, CA), and the primers 5'-CCT GCA GCT TCA GCC CGA CCG GAA CC-3' (H53Q forward), and 5'-GGT TCC GGT CGG GCT GAA GCT GCA GG-3' (H53Q reverse). Clusterin was amplified from HepG2 cDNA with primers containing Xho1 and Xba1 sites and cut into the pCI-neo.X3HA vector.

### *Immunoblotting*

For analysis of protein levels by immunoblotting, cells were rinsed with PBS and scraped from plates in 2 mM EDTA in Tris-buffered saline (TBS). Cells were pelleted and lysed on ice for 10 min in RIPA buffer with fresh protease inhibitors (Roche). Cellular debris was pelleted by centrifugation at 16,000 x g for at least 15 min, followed by quantification of soluble protein by chromatographic assay (Bio-rad). Total protein lysate was boiled in Laemmli reducing buffer, separated by SDS-PAGE, transferred to nitrocellulose, and equivalent loading confirmed by Ponceau S staining (0.1% Ponceau/5% aq. AcOH). Blots were blocked in 5% milk/TBS for about 45 min, followed by thorough rinsing in TBST (TBS + 0.1% Tween 20) and incubation in primary antibody. After several washes with TBST, blots were incubated in 1:10000 fluorescent secondary antibody (Odyssey) in 5% milk/TBS. Blots were washed well in TBST, then TBS and water, then scanned on a Li-COR imager. Band intensities were quantified by densitometry. Error is presented as s.e.m. of at least three replicates, with p values determined by the Student's two-tailed t test.

### *Preparation and characterization of recombinant ERdj3 (<sup>R</sup>ERdj3)*

The *ERdj3* gene coding for the signal peptide cleavage product (23-458) was amplified and cloned into the pSMT3 vector using the BamHI and NotI cleavage sites. Upon reaching an O.D. (600 nm) of 0.6, SHuffle T7 *E. coli* cells (NEB) expressing this His<sub>6</sub> SMT3(SUMO)-ERdj3 chimera were induced overnight with 1 mM IPTG at



were incubated with 20 mM ATP at 37 °C for 1 h, in a 96-well plate and luminescence recorded on a Safire2 scanner (Tecan). The final ATP concentration was calibrated to a standard curve from 0.2 μM to 2000 μM.

#### *Denatured RNase A Affinity Precipitation*

About 100 μL RNase A conjugated beads were denatured in 1.2 ml of 20 mM Tris pH 8.8, 6 M guanidinium hydrochloride (GdnHCl) and 100 mM DTT overnight. Denatured beads were washed with PBS buffer and then incubated in 100 μL of 50 mM Tris pH 8.0 with 18 μM iodoacetamide to block free thiol groups. Excess iodoacetamide was washed off with PBS. ERdj3 protein levels in media collected from cells overexpressing GFP (mock), ERdj3<sup>WT</sup>, or ERdj3<sup>H53Q</sup> were quantified by immunoblotting. Normalized media was divided in equal parts for incubation with either denatured RNase A beads or native RNase A beads at ambient temperature for 2 h. The beads were washed 4 times with 20 mM HEPES pH 7.0, 75 mM KCl, 5 mM MgCl<sub>2</sub> and 0.01% Tween 20, and eluted with 6 X reducing Laemmli for SDS-PAGE separation and immunoblotting. For experiments with recombinant ERdj3, 500 μL of 10 μM <sup>R</sup>ERdj3 in HKM buffer was added to each condition (quenched sepharose, native RNase A beads, and denatured RNase A beads), and incubated for 1 h before washing.

#### *Aβ aggregation assay*

Aβ<sub>1-40</sub> peptide was prepared and purified as reported (Du et al, 2011), with the identity of the peptide confirmed using MALDI-TOF. Lyophilized Aβ<sub>1-40</sub> was dissolved in 15 mM NaOH and adjusted to pH 10.5 with 100 mM NaOH. The completely dissolved solution was sonicated in an ice-water bath for 1 h and passed through a 0.2 μm PVDF syringe filter into an Ultra-2 10K filter (Amicon). The flow through was recovered after centrifugation at 4000 rpm. Aβ<sub>1-40</sub> concentration was determined by UV absorption after neutralization to pH 6.8. The final reaction mixture consisting of 10 μM Aβ<sub>1-40</sub> with the indicated ratio of <sup>R</sup>ERdj3 or BSA in 50 mM Na phosphate, pH 7.2, 150 mM NaCl, 1 mM EDTA and 20 μM Thioflavin T, was prepared and vortexed immediately before loading 100 μL per well into a 96-well plate (Costar #3631). The covered plate was loaded into a Gemini Spectra-Max EM fluorescence plate reader (MolecularDevices, Sunnyvale, CA) and Thioflavin T fluorescence (excitation at 440 nm, emission at 485 nm) was recorded at 37 °C from the bottom of the plate at 10 min interval with 5 s shaking before reading.

After the assay, the solution in the wells was recovered and either reserved or centrifuged at 16000 x *g* for 20 min to precipitate insoluble amyloid. 100  $\mu$ L of 8 M GdnHCl was added to the emptied well, and the whole plate sonicated on ice to remove adherent amyloid stuck to the side wall of the well. All samples were brought up to the same volume of 8 M GdnHCl, sonicated on ice for 1 h, diluted in PBS and separated by SDS-PAGE for immunoblotting.

#### *Resazurin assay*

For metabolic assays,  $10^4$  cells in 50  $\mu$ L of media were plated in each well of a 96-well clear flat-bottom plate (Corning 3603), and 1  $\mu$ g/mL of doxycycline added to inducible cells lines for at least 5 h prior to treatment. 50  $\mu$ L of media with Tg or vehicle was added to each well to achieve indicated final concentrations, and the plate incubated at 37  $^{\circ}$ C for 13 h. Resazurin stock was prepared at 500  $\mu$ M in PBS and sterile-filtered. 10  $\mu$ L of stock was added to each well and incubated at 37  $^{\circ}$ C for another hour before reading. The resazurin reading was taken with the TECAN Safire<sup>2</sup> plate reader, with excitation at 530 nM and emission recorded at 590 nM.



## Supplemental References:

Du D, Murray AN, Cohen E, Kim HE, Simkovsky R, Dillin A, Kelly JW (2011) A kinetic aggregation assay allowing selective and sensitive amyloid-beta quantification in cells and tissues. *Biochemistry-US* **50**: 1607-1617

Schindelin J, Arganda-Carreras I, Frise E, Kaynig V, Longair M, Pietzsch T, Preibisch S, Rueden C, Saalfeld S, Schmid B, Tinevez JY, White DJ, Hartenstein V, Eliceiri K, Tomancak P, Cardona A (2012) Fiji: an open-source platform for biological-image analysis. *Nature methods* **9**: 676-682

Shen Y, Hendershot LM (2005) ERdj3, a stress-inducible endoplasmic reticulum DnaJ homologue, serves as a cofactor for BiP's interactions with unfolded substrates. *Mol Biol Cell* **16**: 40-50

Shoulders MD, Ryno LM, Genereux JC, Moresco JJ, Tu PG, Wu C, Yates JR, 3rd, Su AI, Kelly JW, Wiseman RL (2013) Stress-Independent Activation of XBP1s and/or ATF6 Reveals Three Functionally Diverse ER Proteostasis Environments. *Cell reports* **3**: 1279-1292
