# Supplementary material
Source: PubMed Central journal article supplement (PMC4291477)

**Figure 2A**

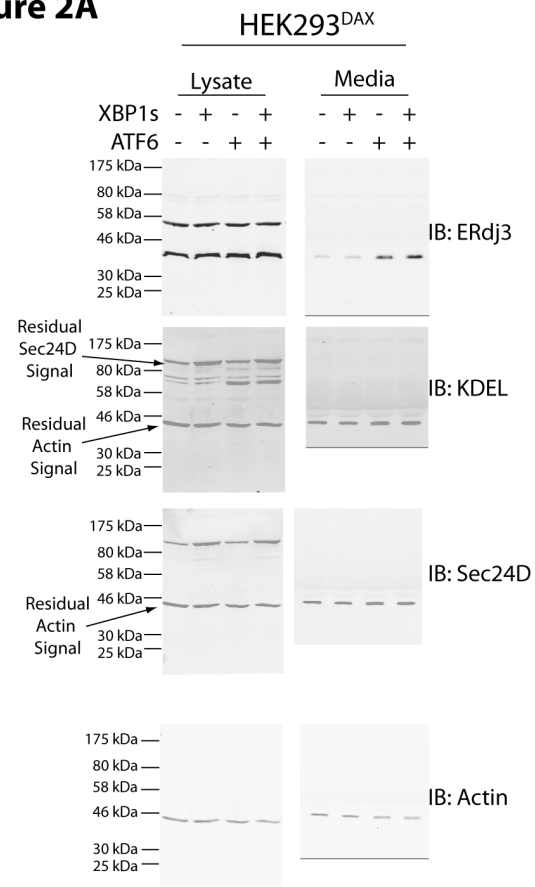

**Figure 2B**

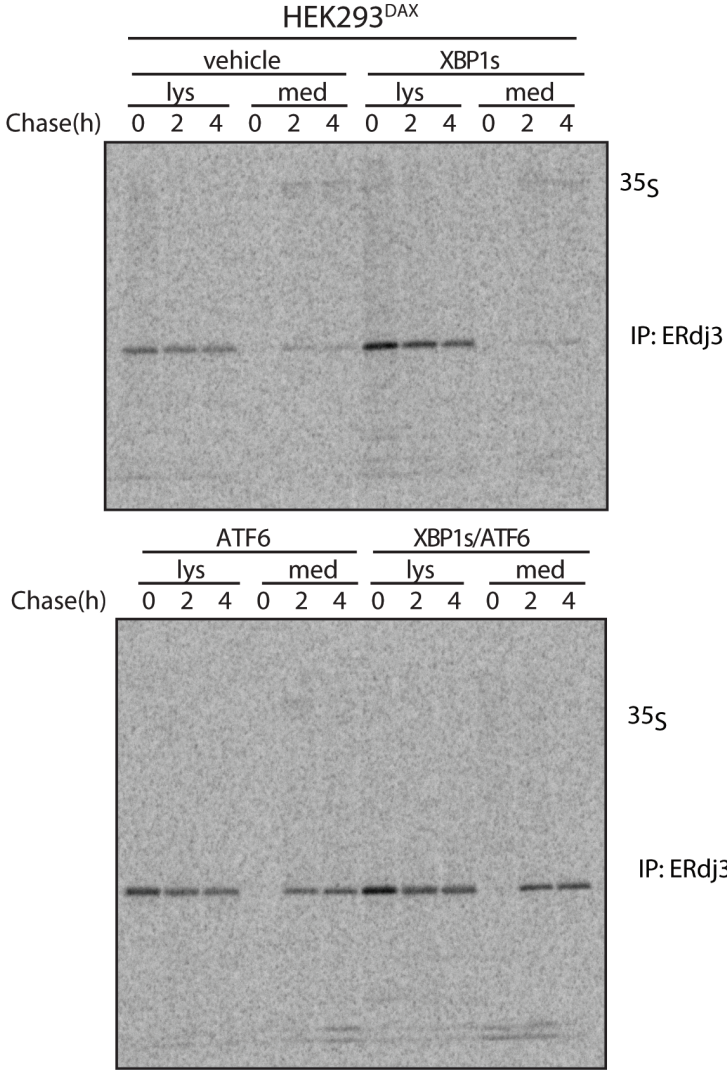

Supplement: embj0034-0004-sd10.pdf [file embj0034-0004-sd10.pdf]

Fig 3A

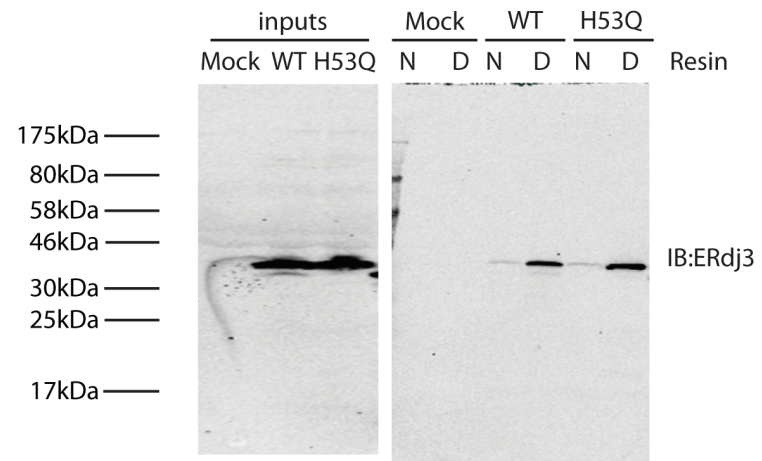

Fig 3D

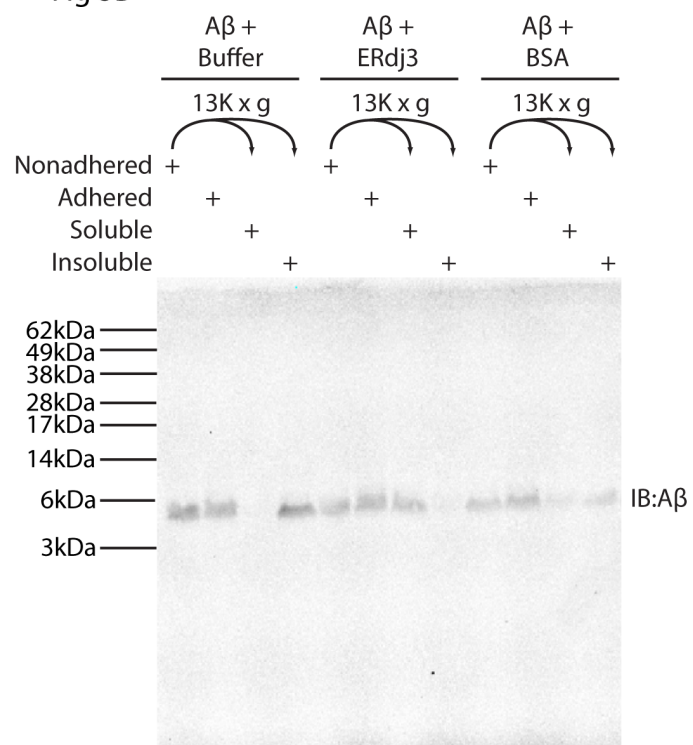

Supplement: embj0034-0004-sd11.pdf [file embj0034-0004-sd11.pdf]

Figure 5B

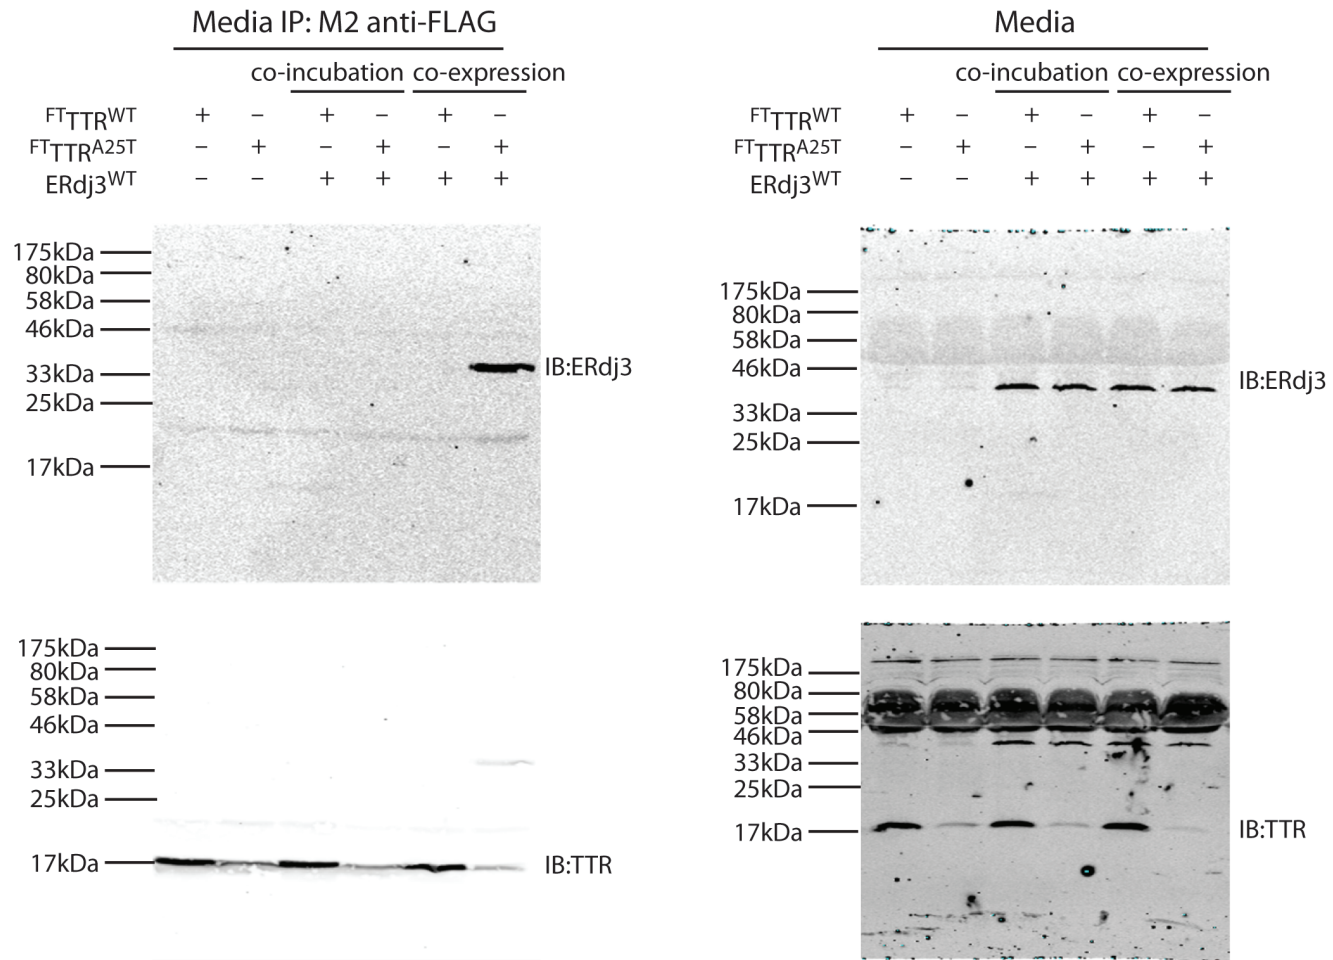

Figure 5C

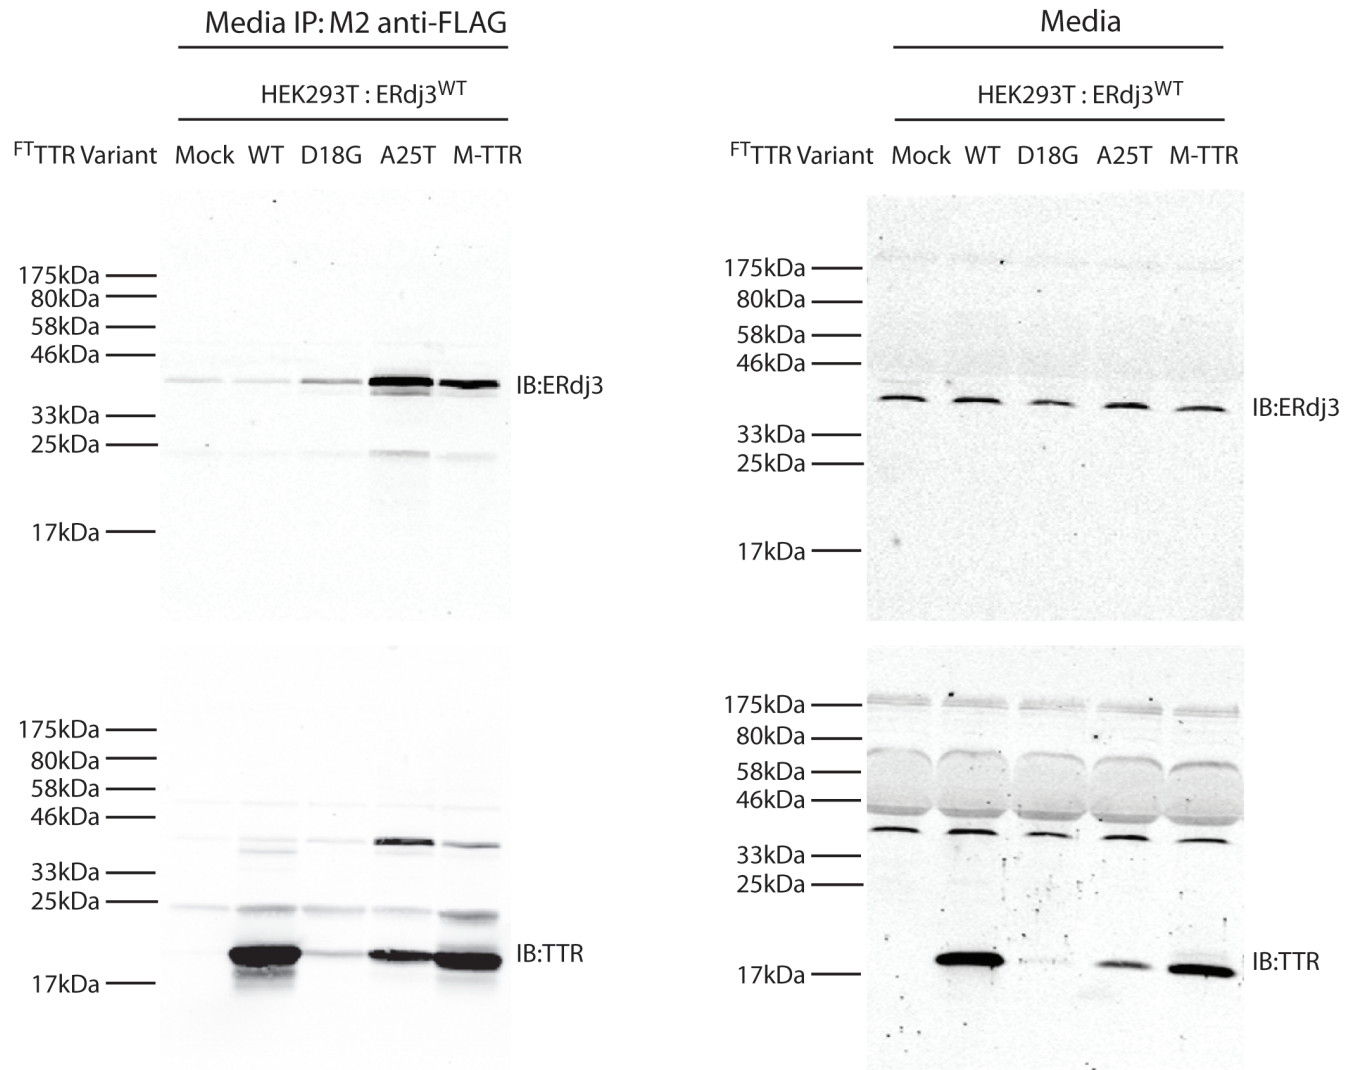

Figure 5D

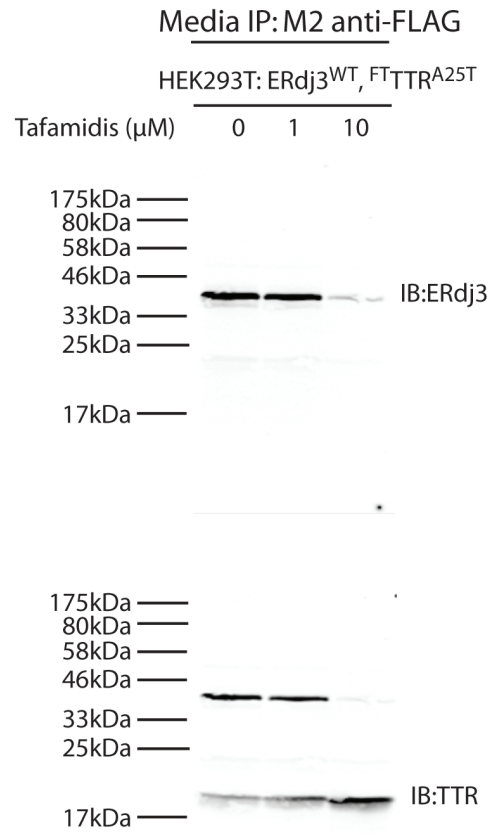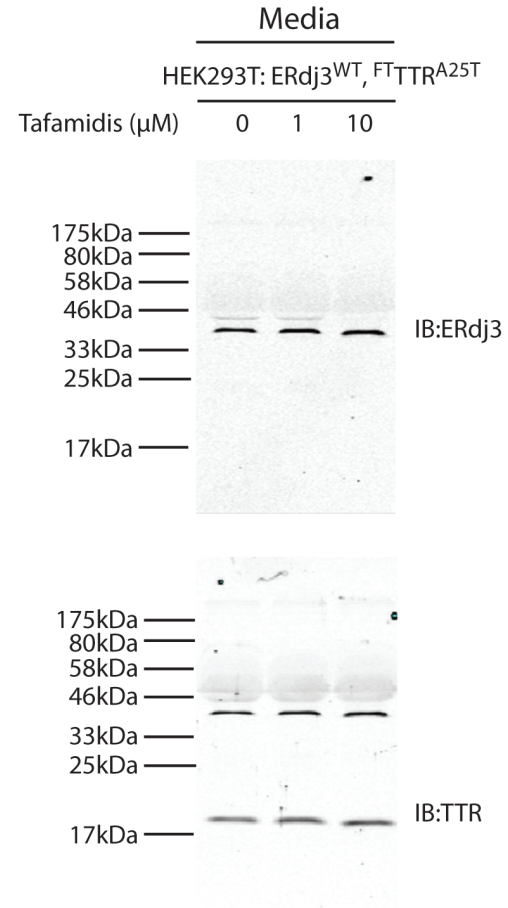

**Figure 5E**

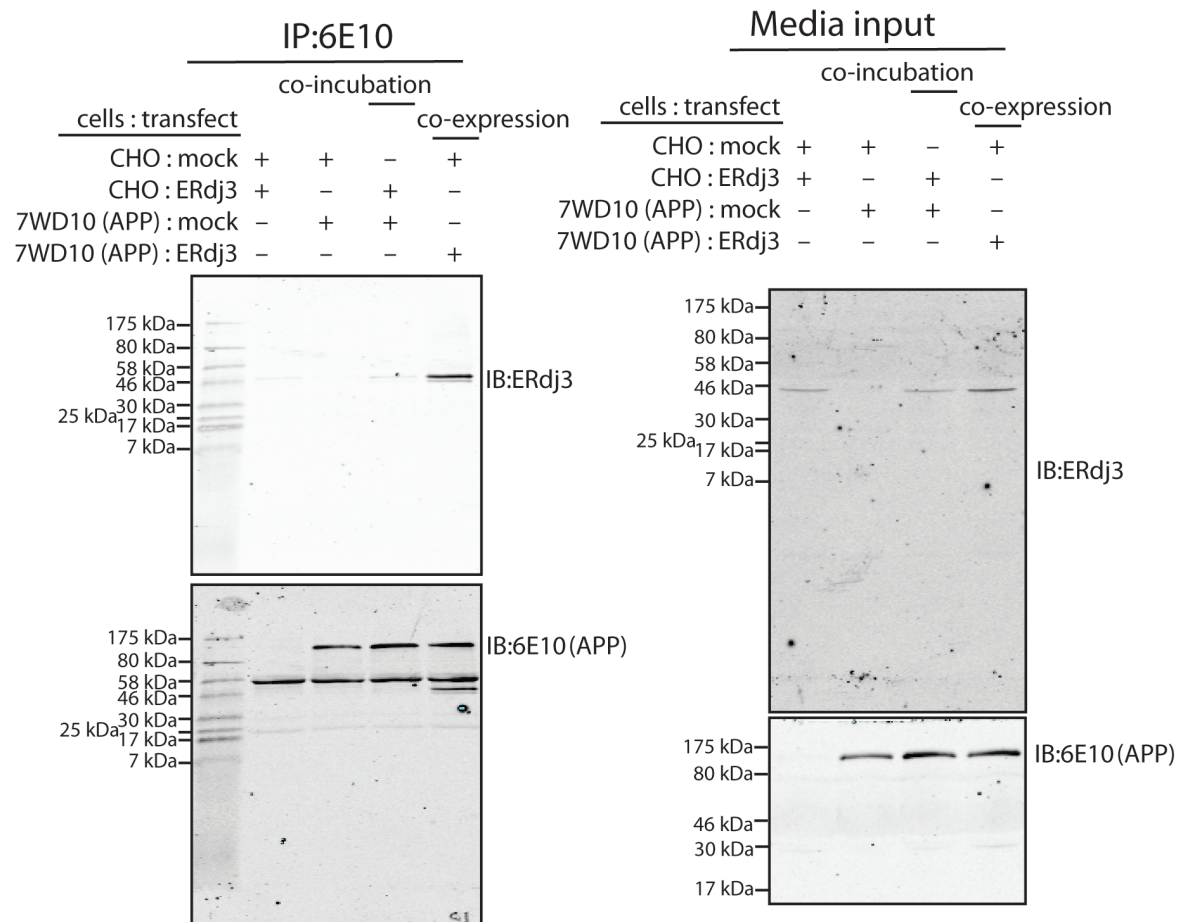

Supplement: embj0034-0004-sd12.pdf [file embj0034-0004-sd12.pdf]

**Figure 6A**

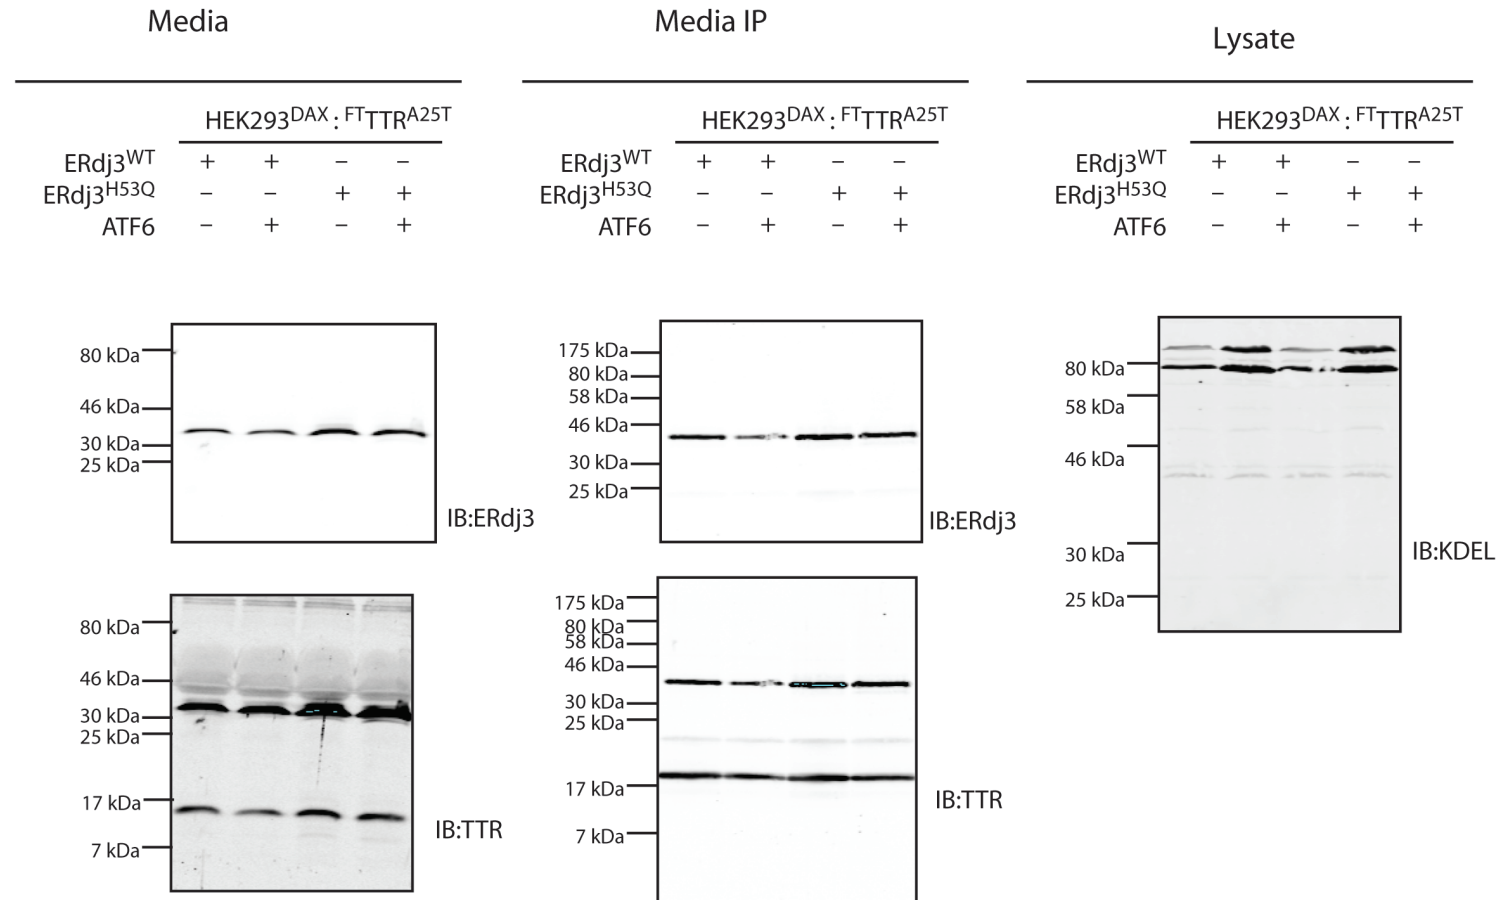

**Figure 6C**

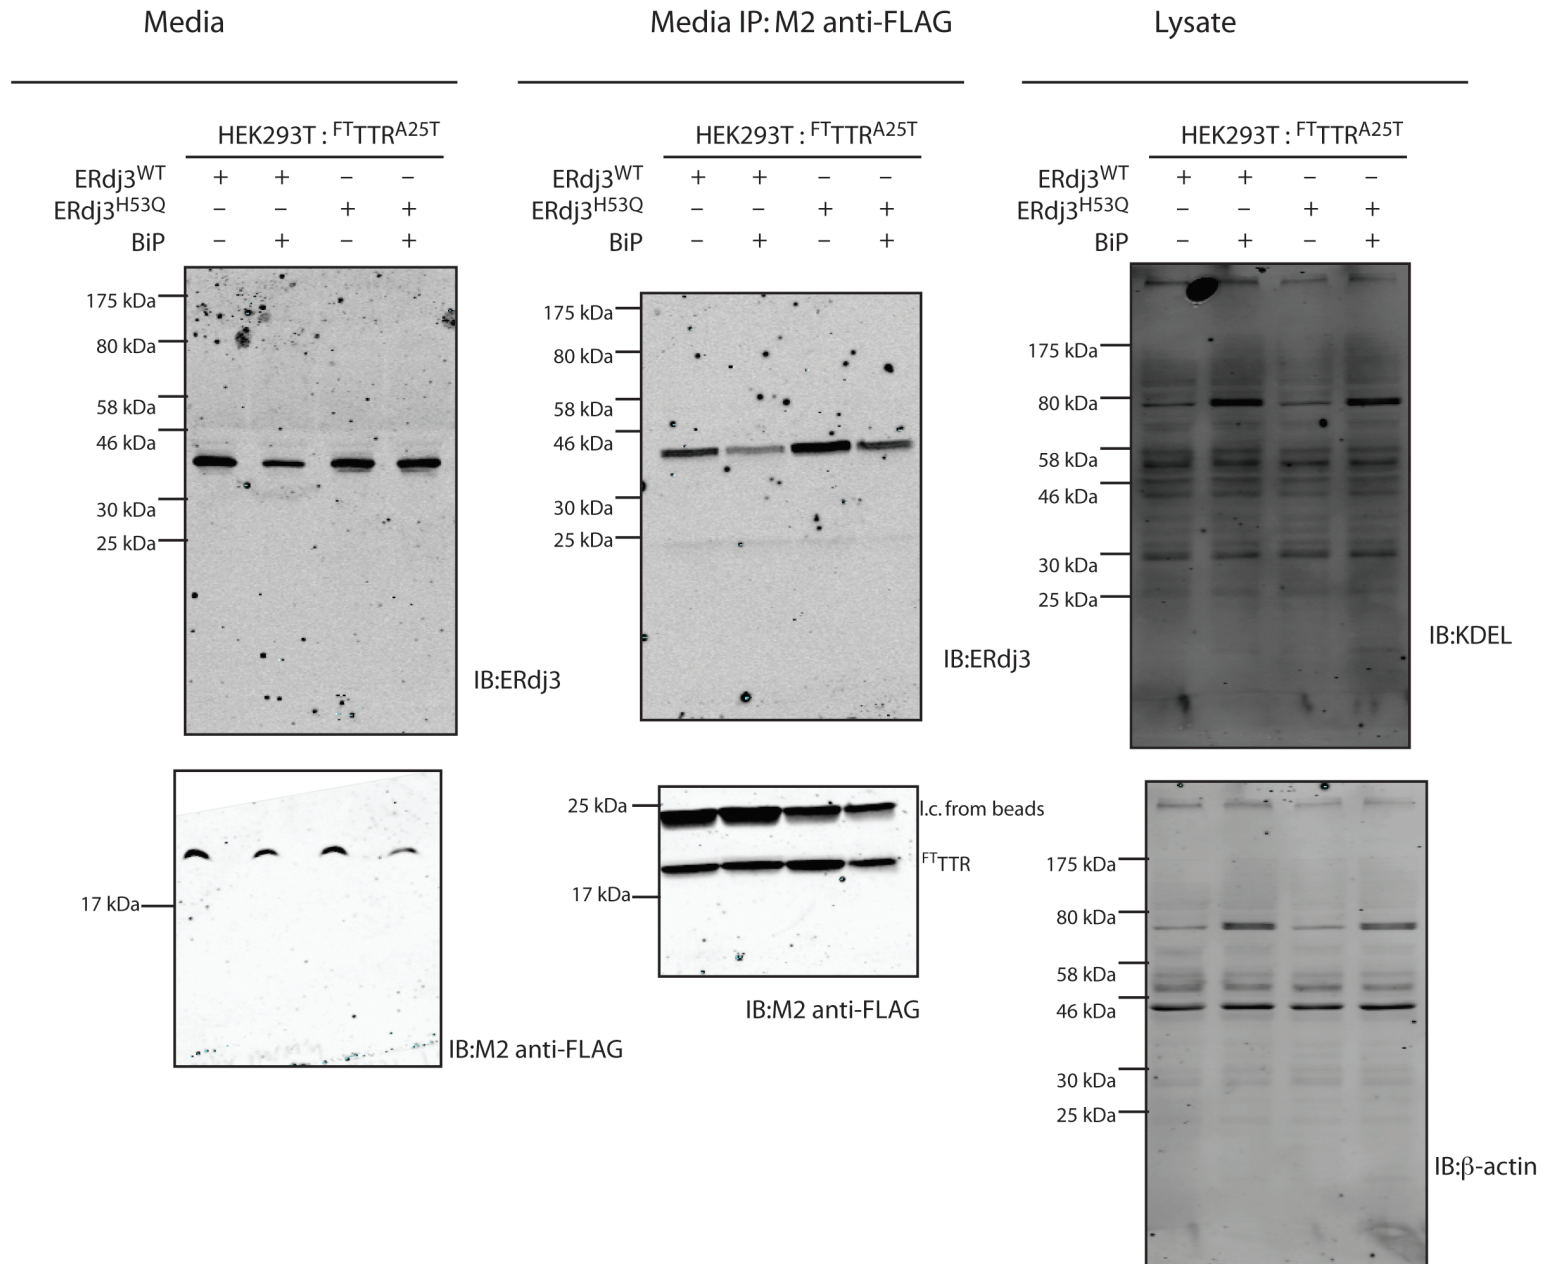

**Figure 6E**

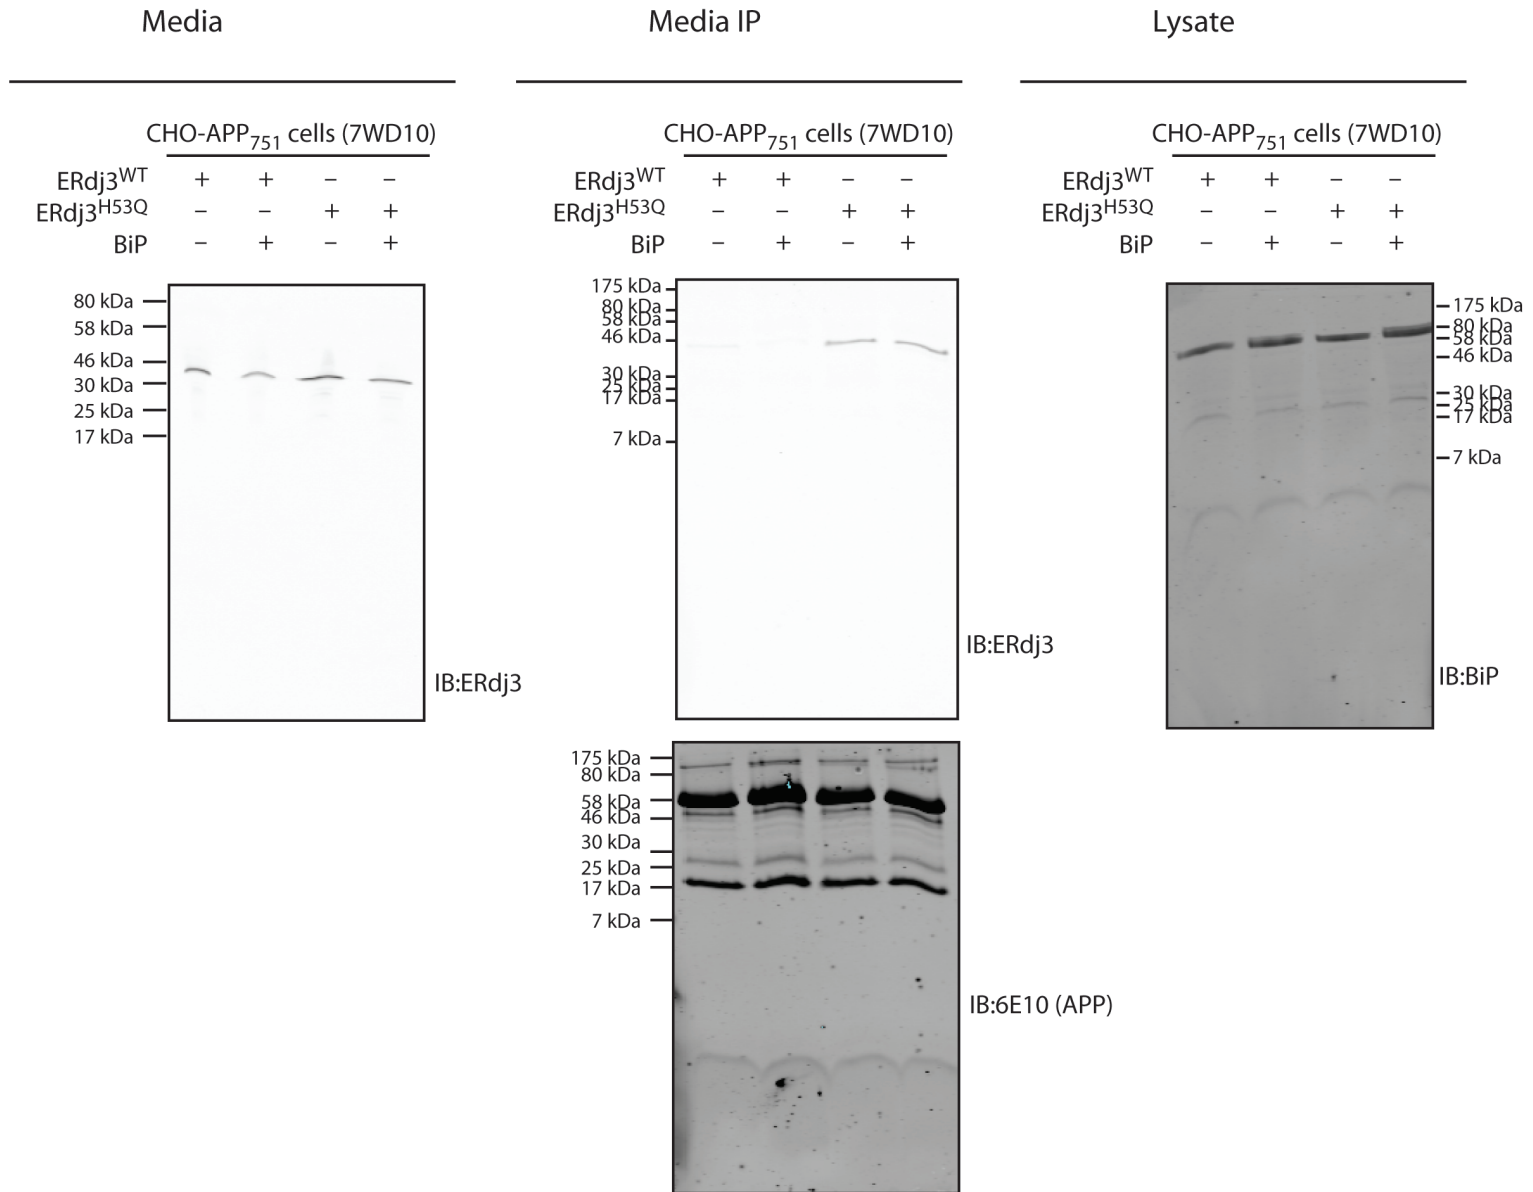

Supplement: embj0034-0004-sd13.pdf [file embj0034-0004-sd13.pdf]

Figure S1A

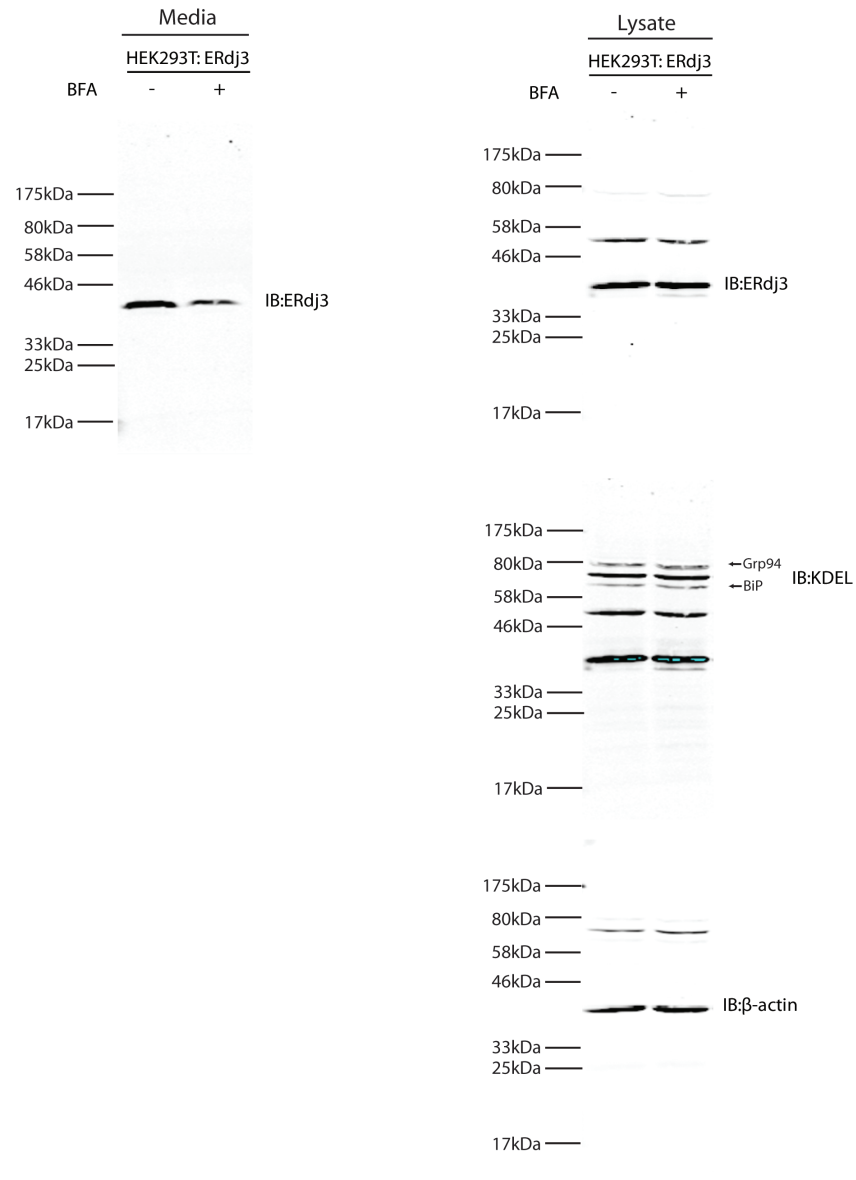



Figure S1D

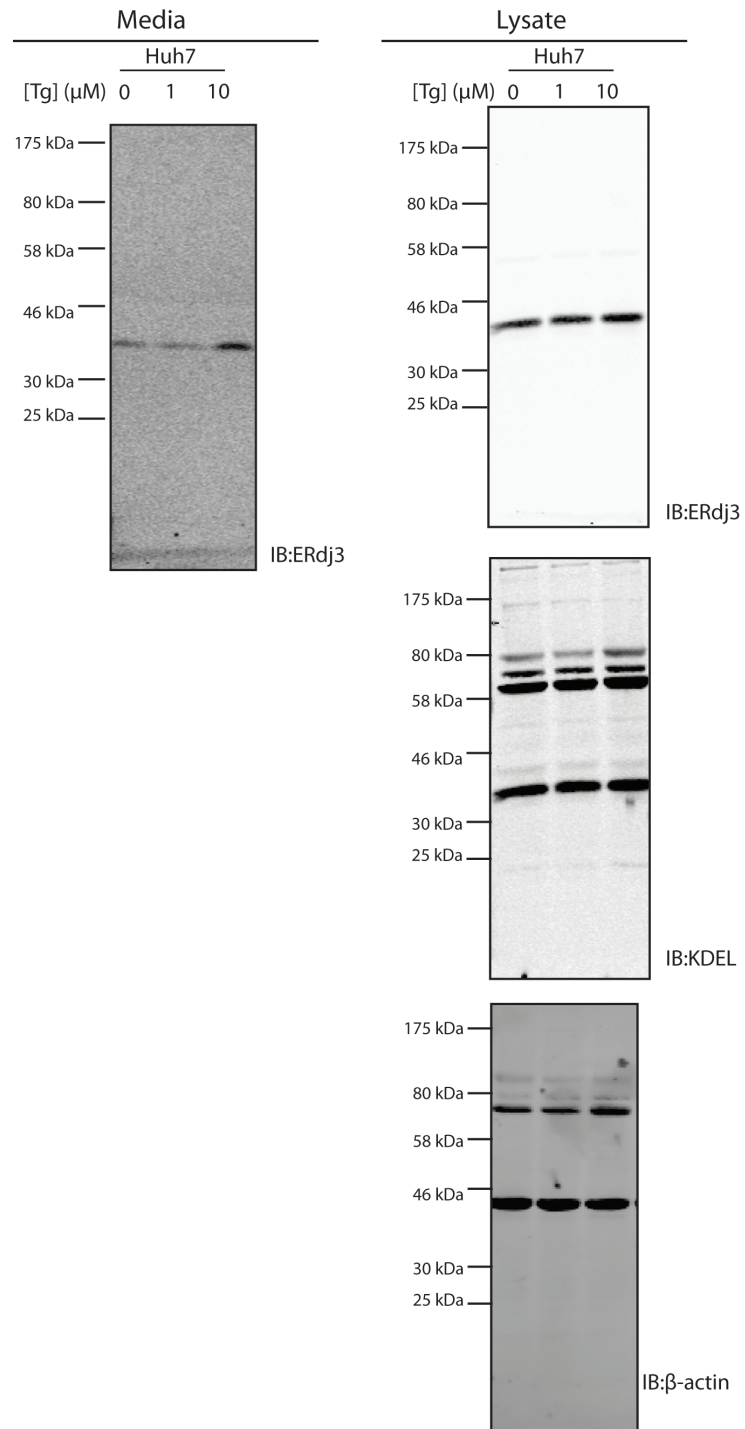

**Figure S1E**

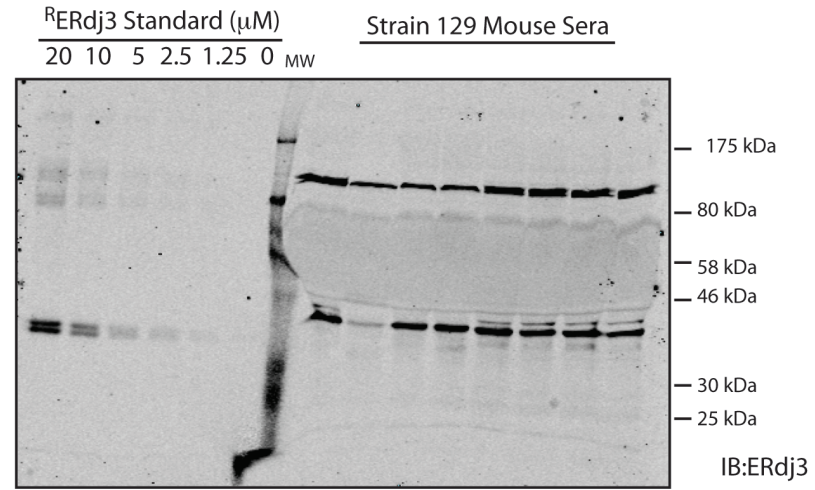

Figure S1F

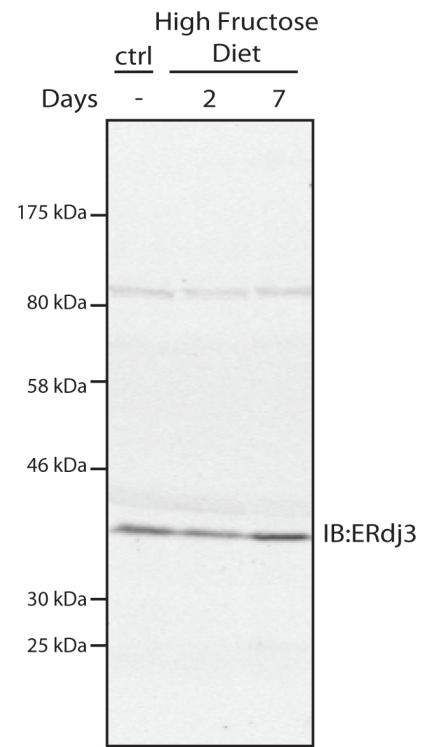

Supplement: embj0034-0004-sd2.pdf [file embj0034-0004-sd2.pdf]

Figure S2C

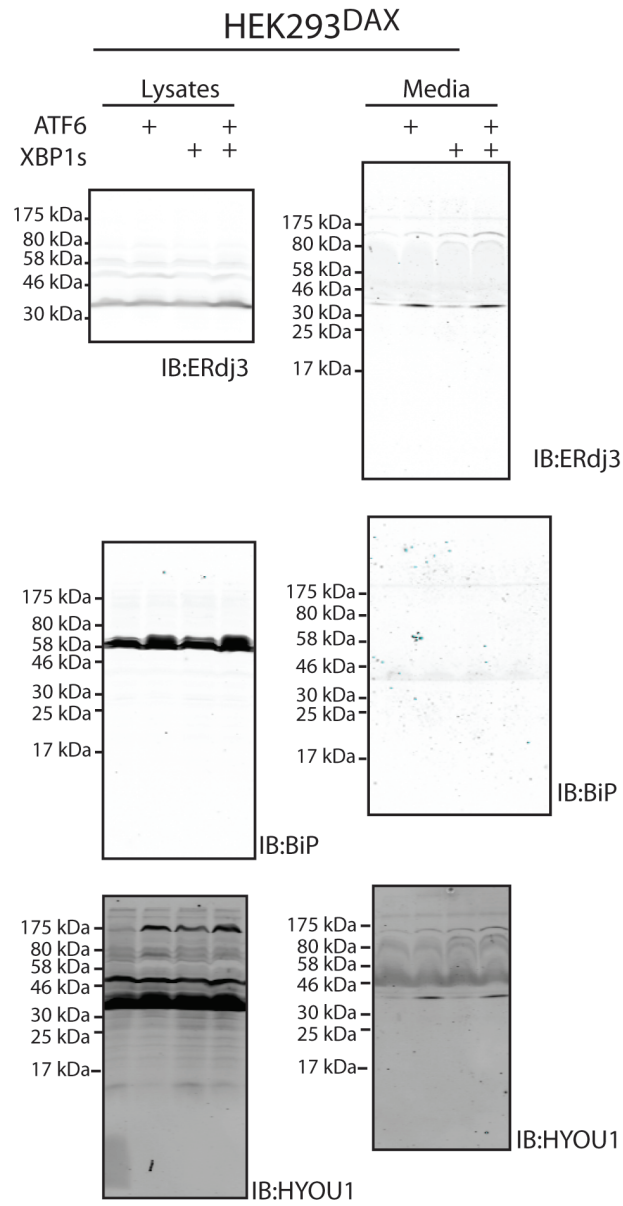

**Figure S2D**

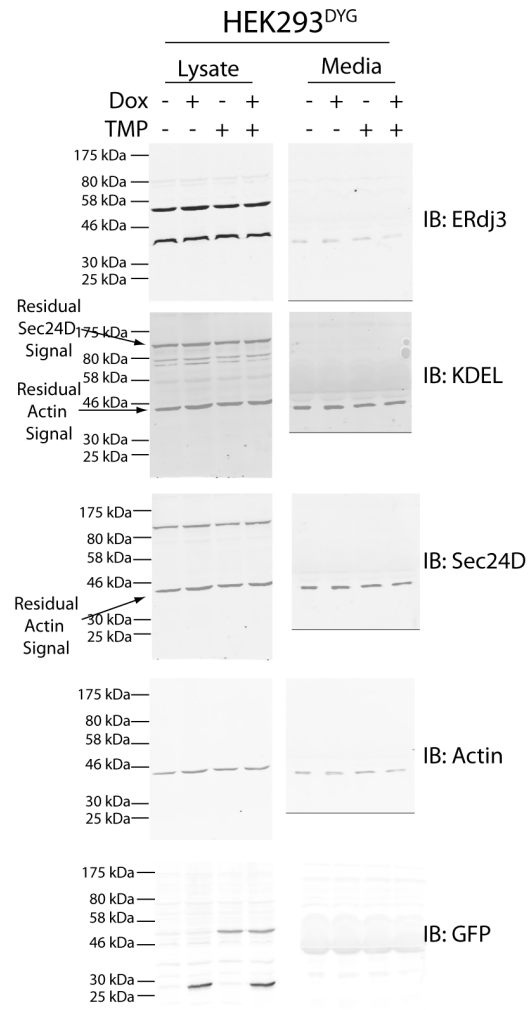

**Figure S2E**

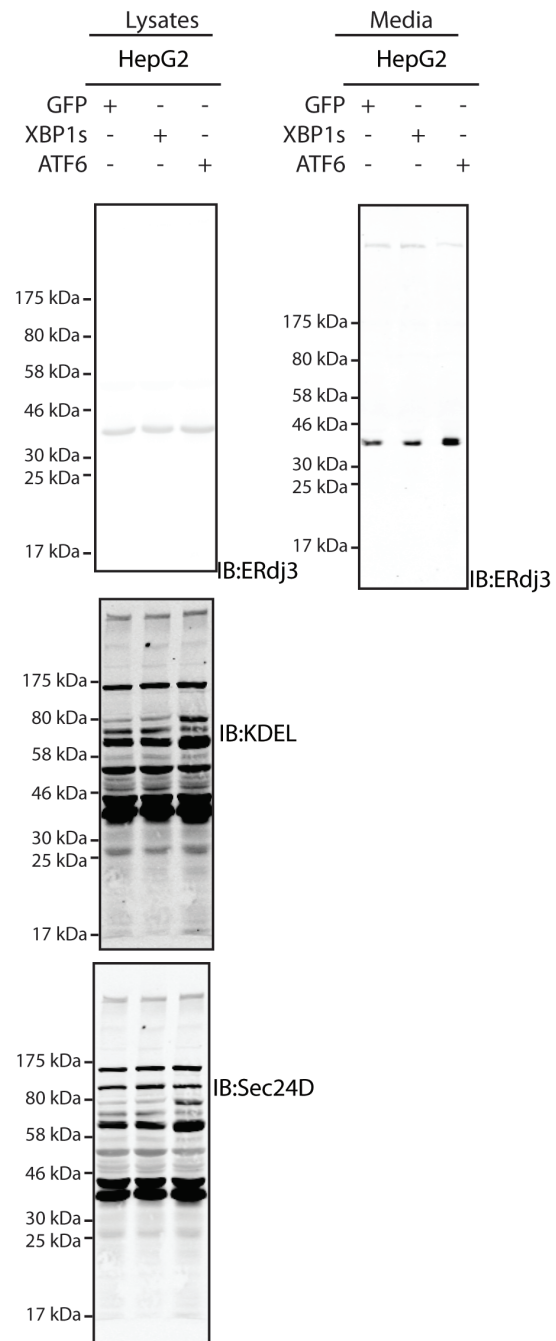

Supplement: embj0034-0004-sd3.pdf [file embj0034-0004-sd3.pdf]

Figure S3E

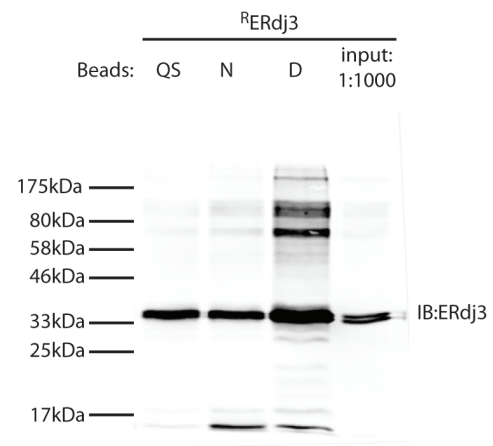

Supplement: embj0034-0004-sd4.pdf [file embj0034-0004-sd4.pdf]

Figure S4A

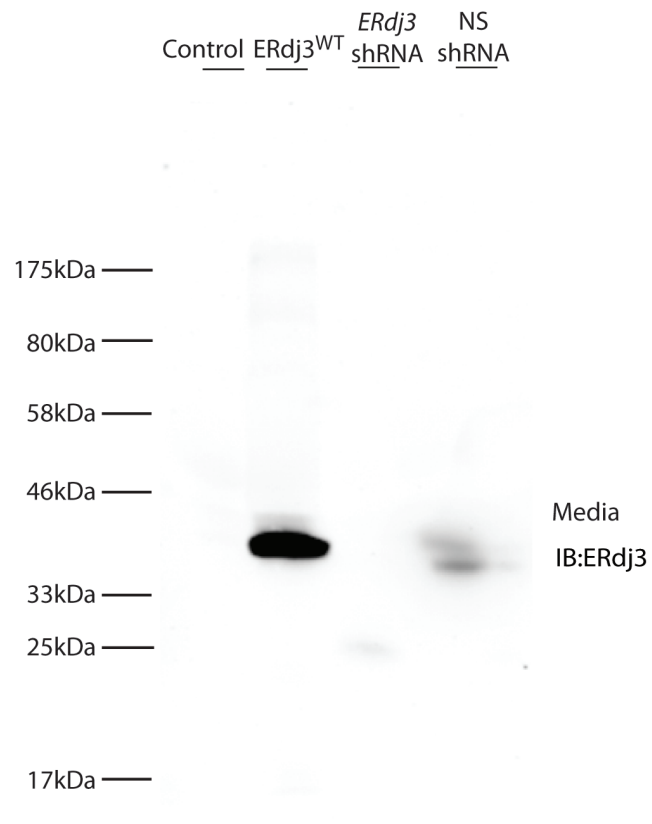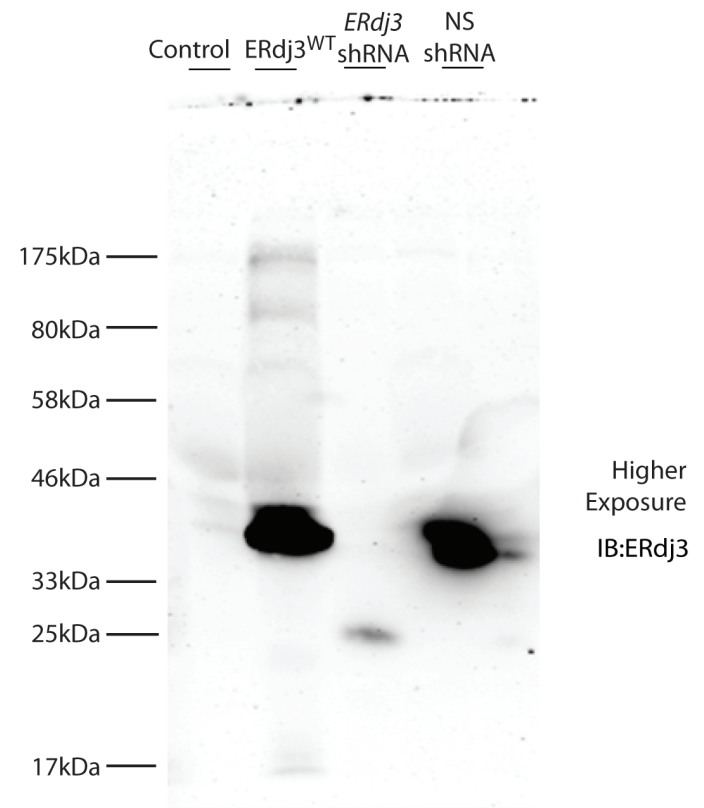

Supplement: embj0034-0004-sd5.pdf [file embj0034-0004-sd5.pdf]

Figure S5A

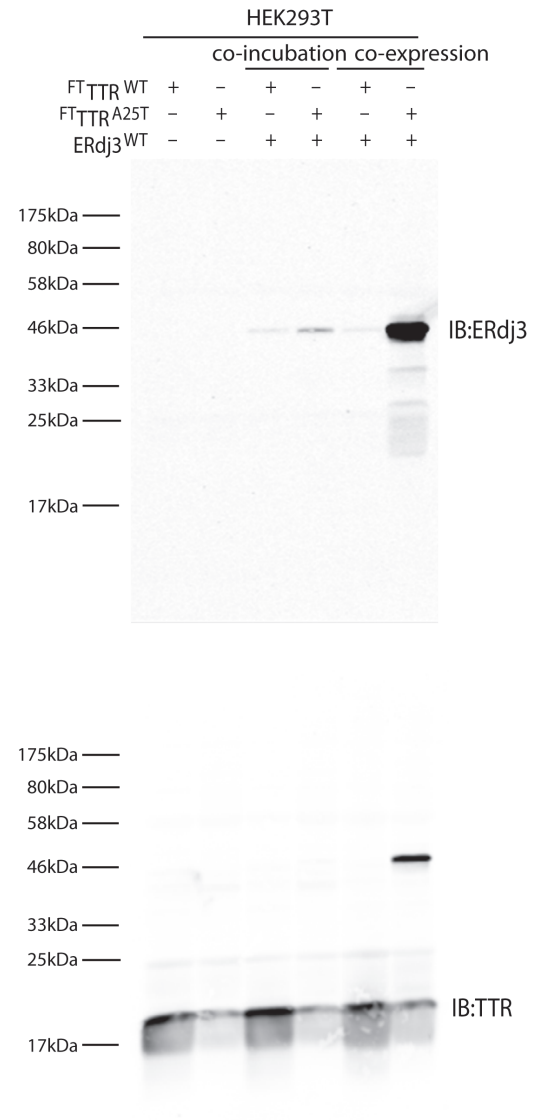

Figure S5B

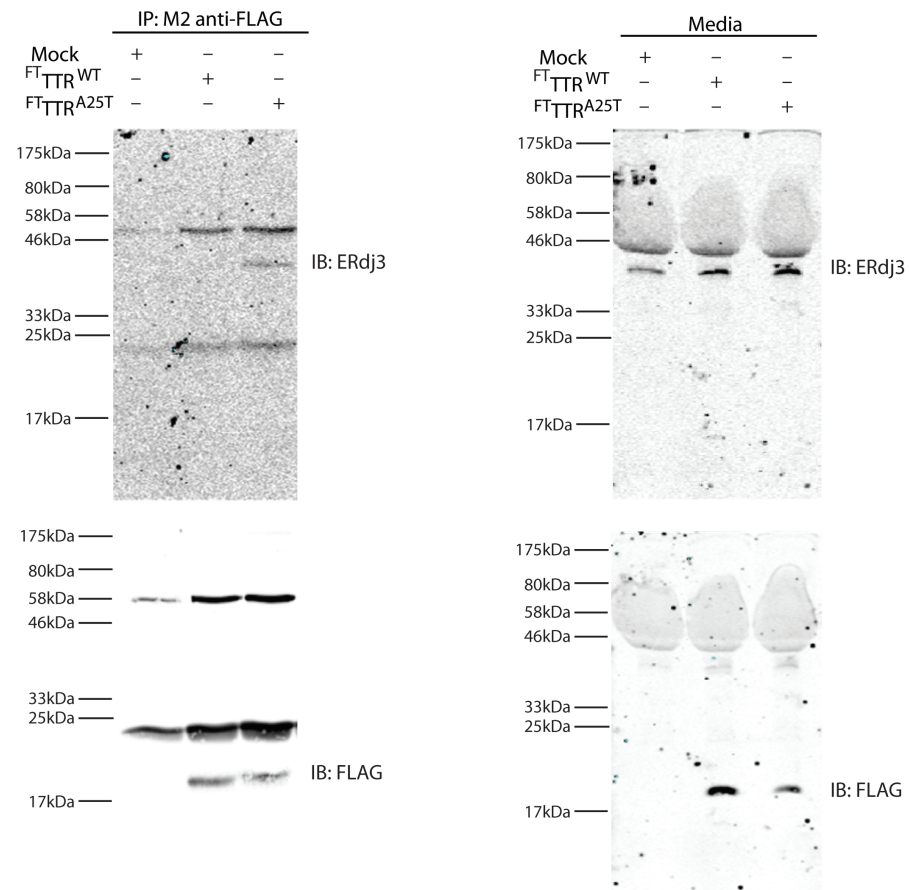

**Figure S5D**

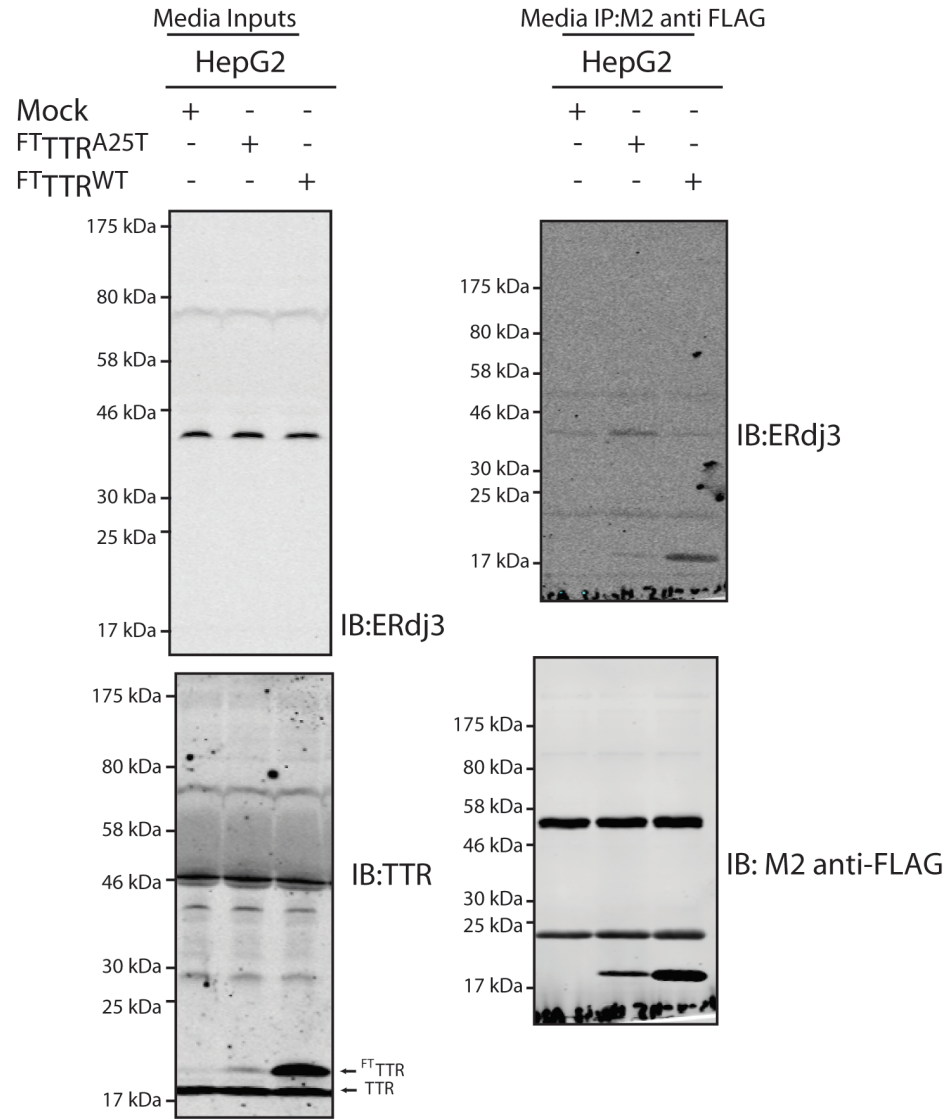

**Figure S5E**

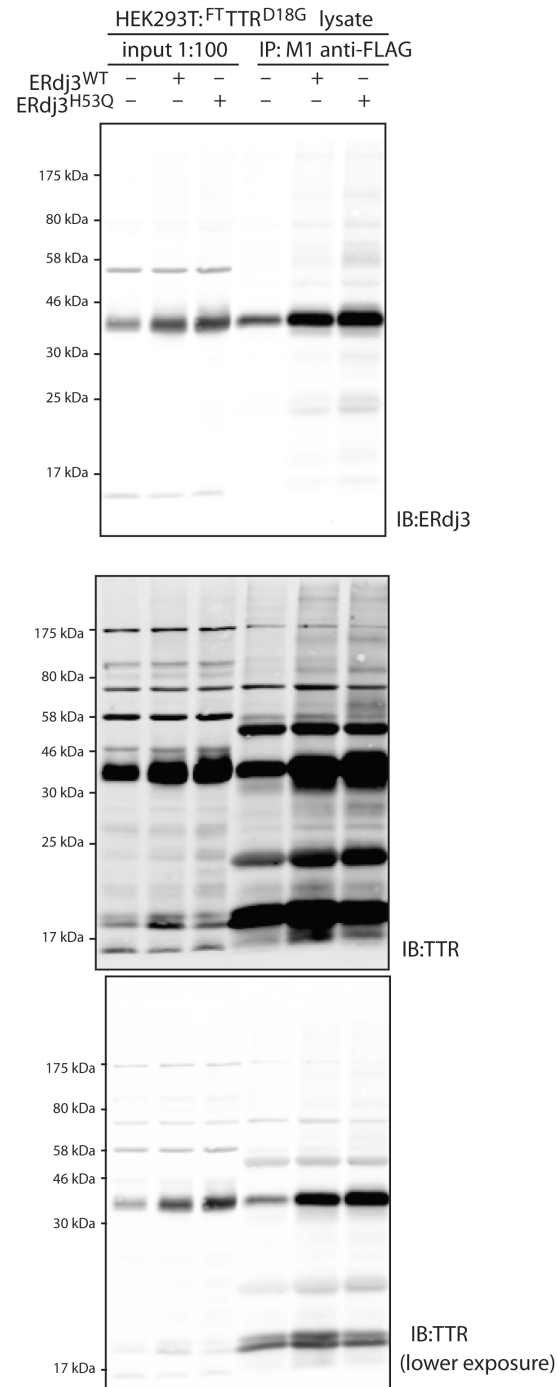

Figure S5F

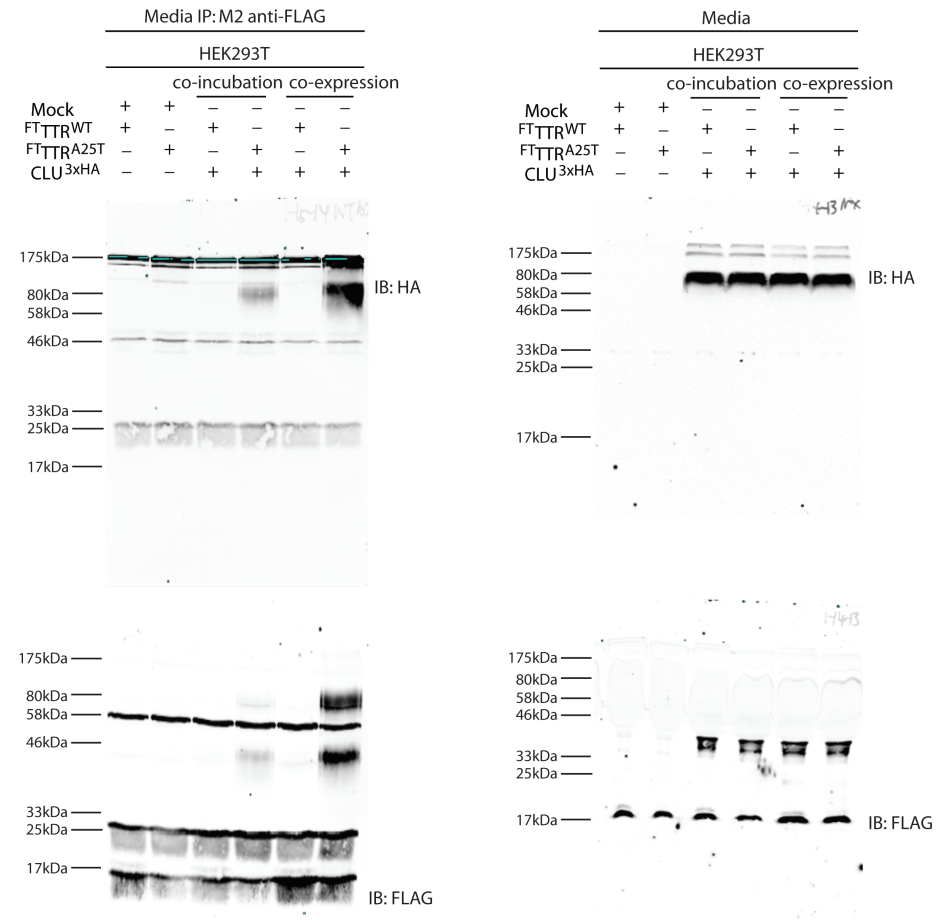

Figure S5G

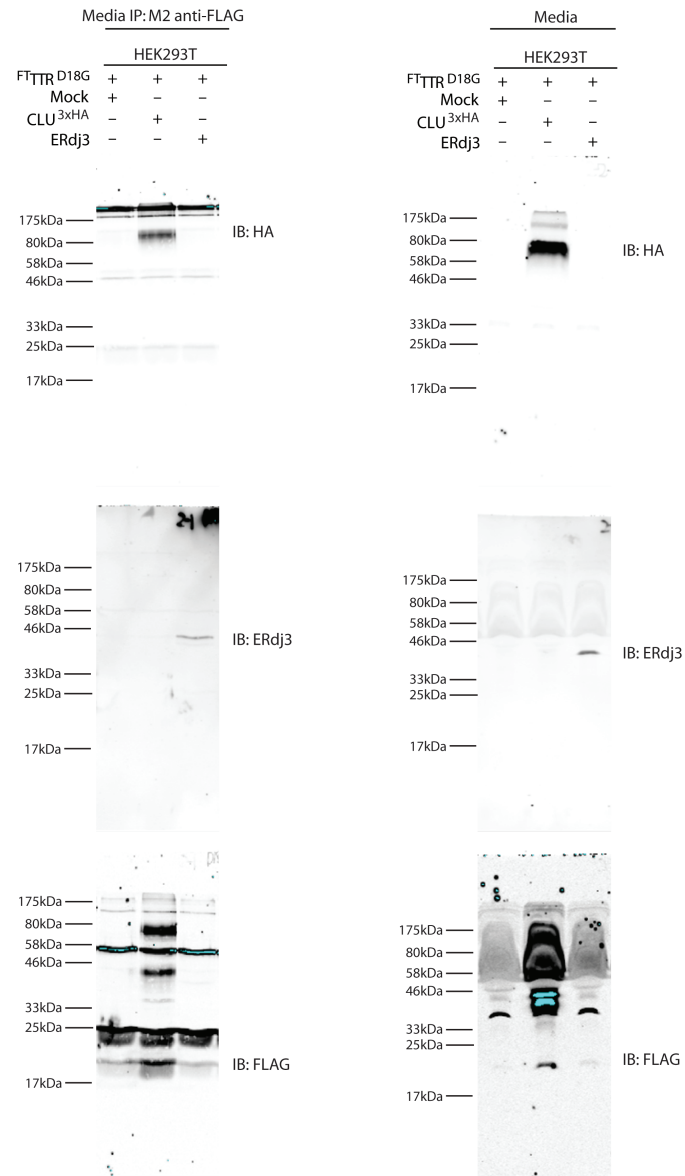

Supplement: embj0034-0004-sd6.pdf [file embj0034-0004-sd6.pdf]

**Figure S6A**

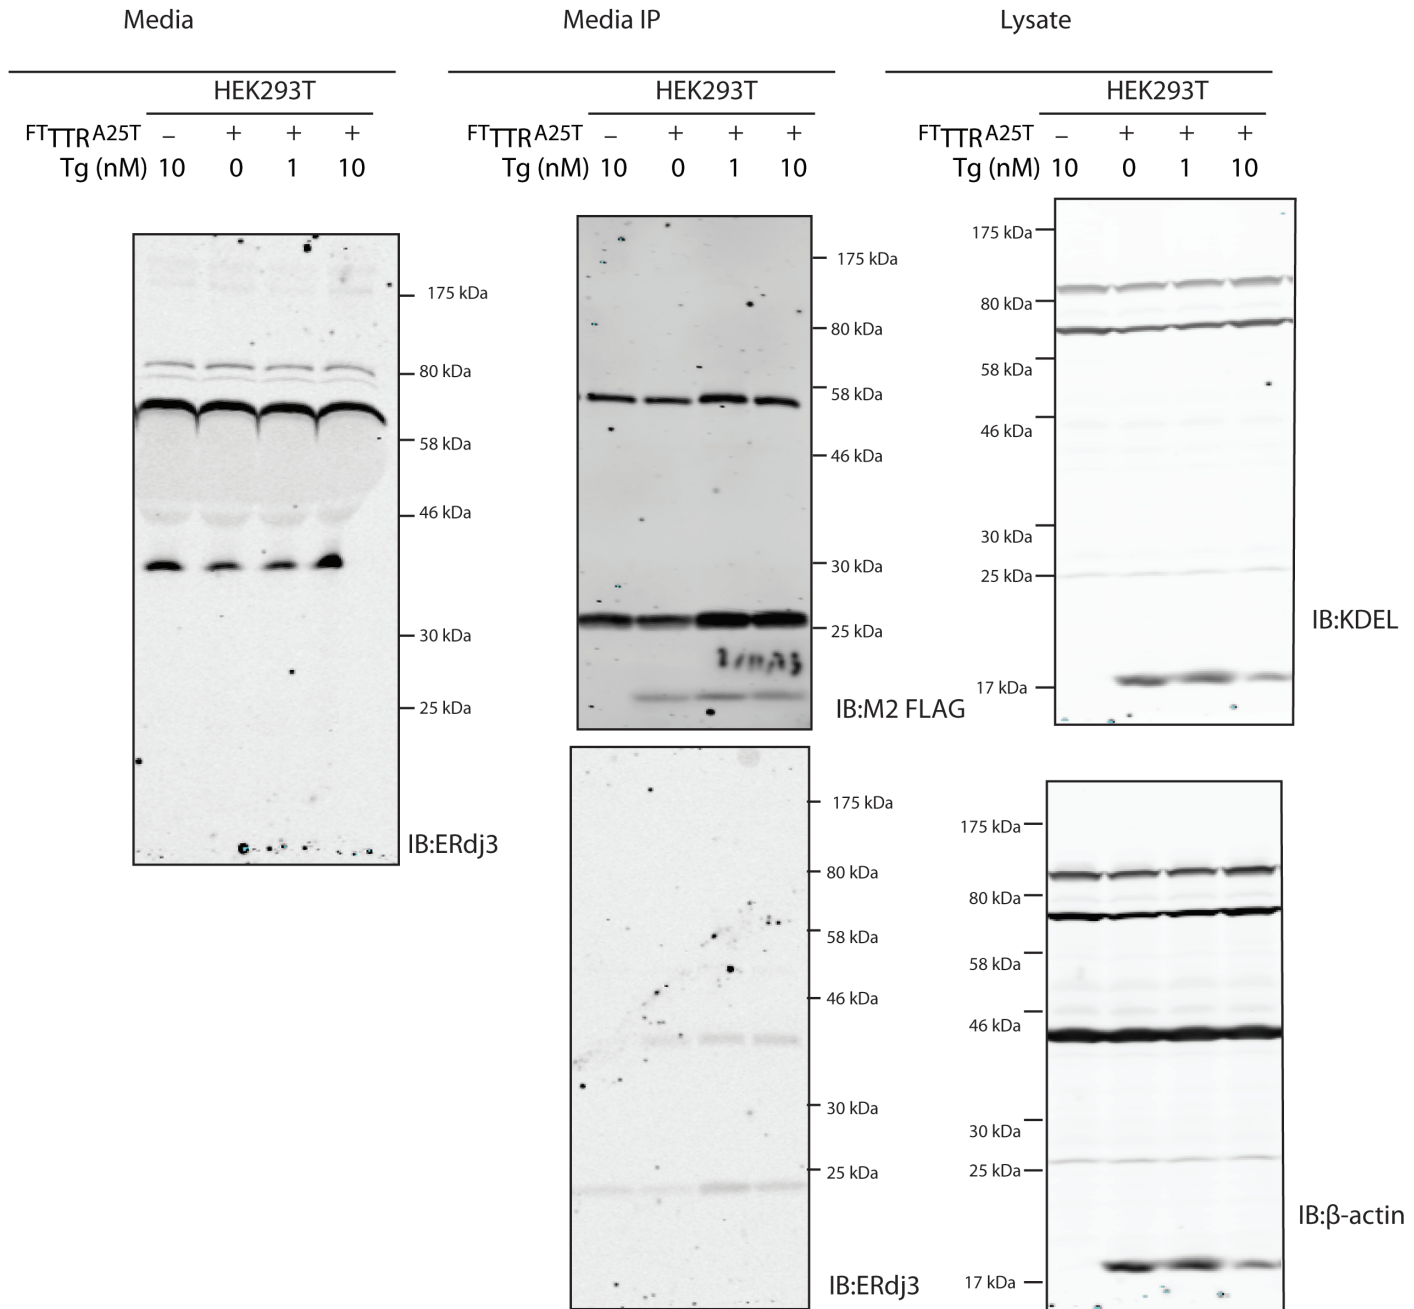

**Figure S6C**

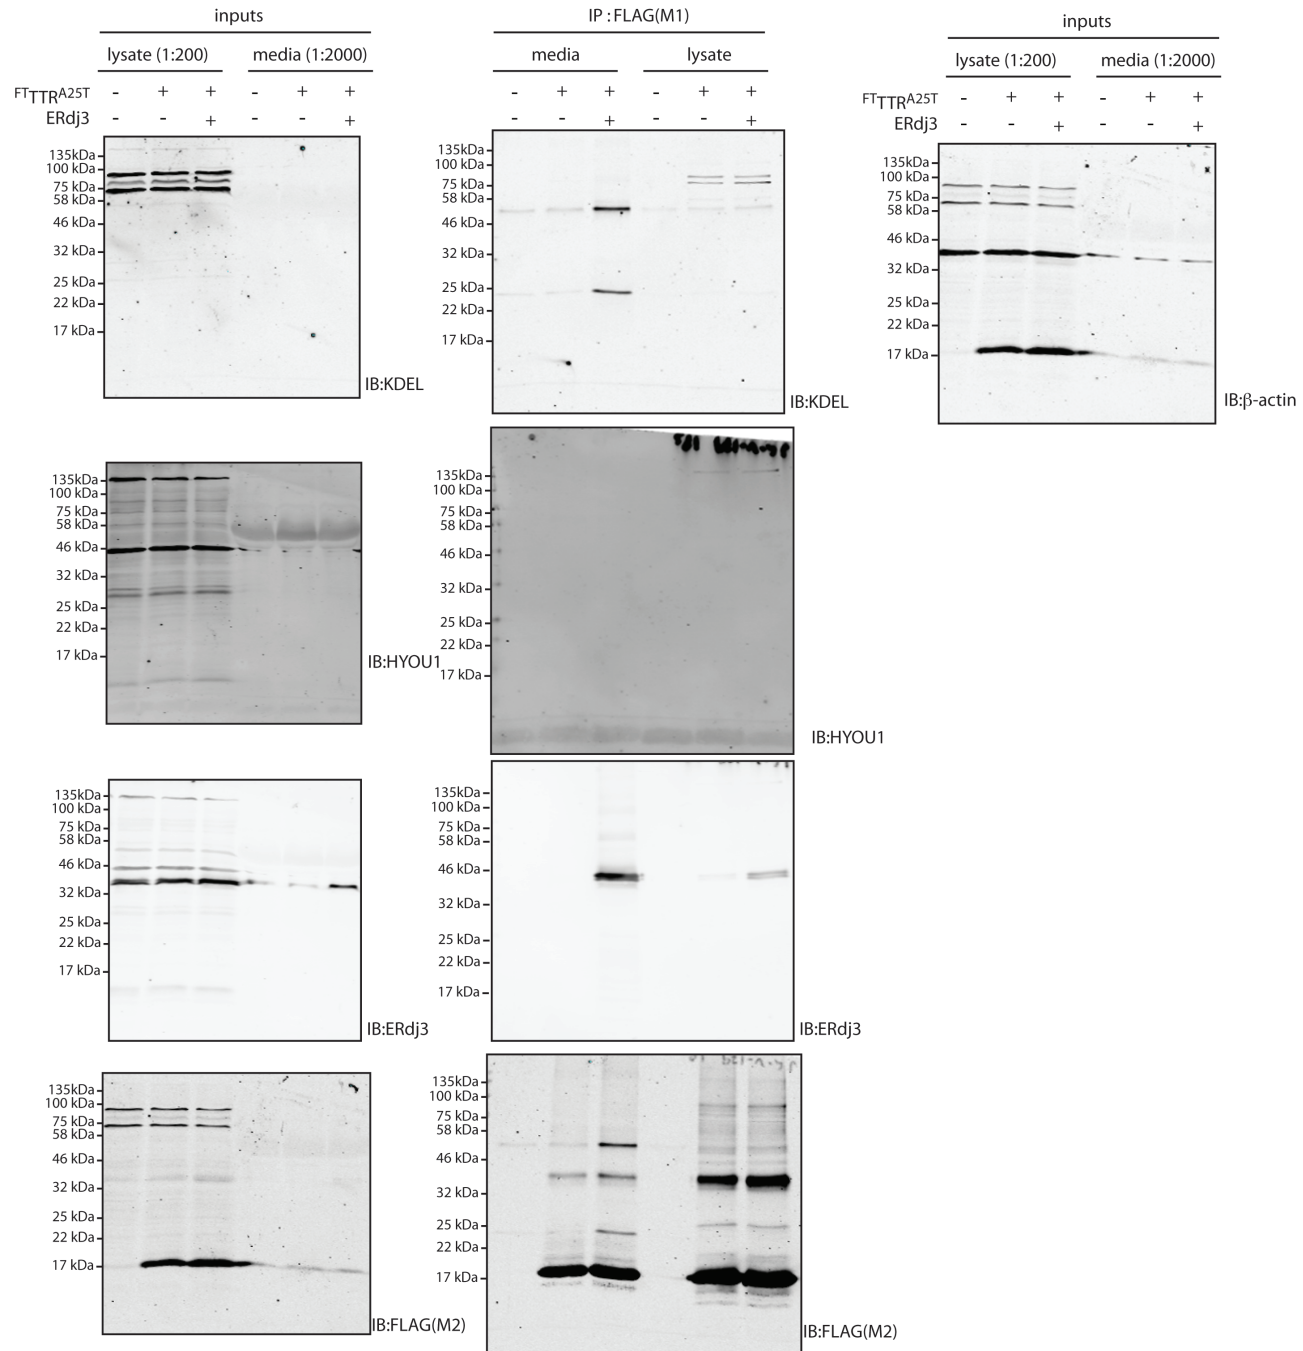

Figure S6D

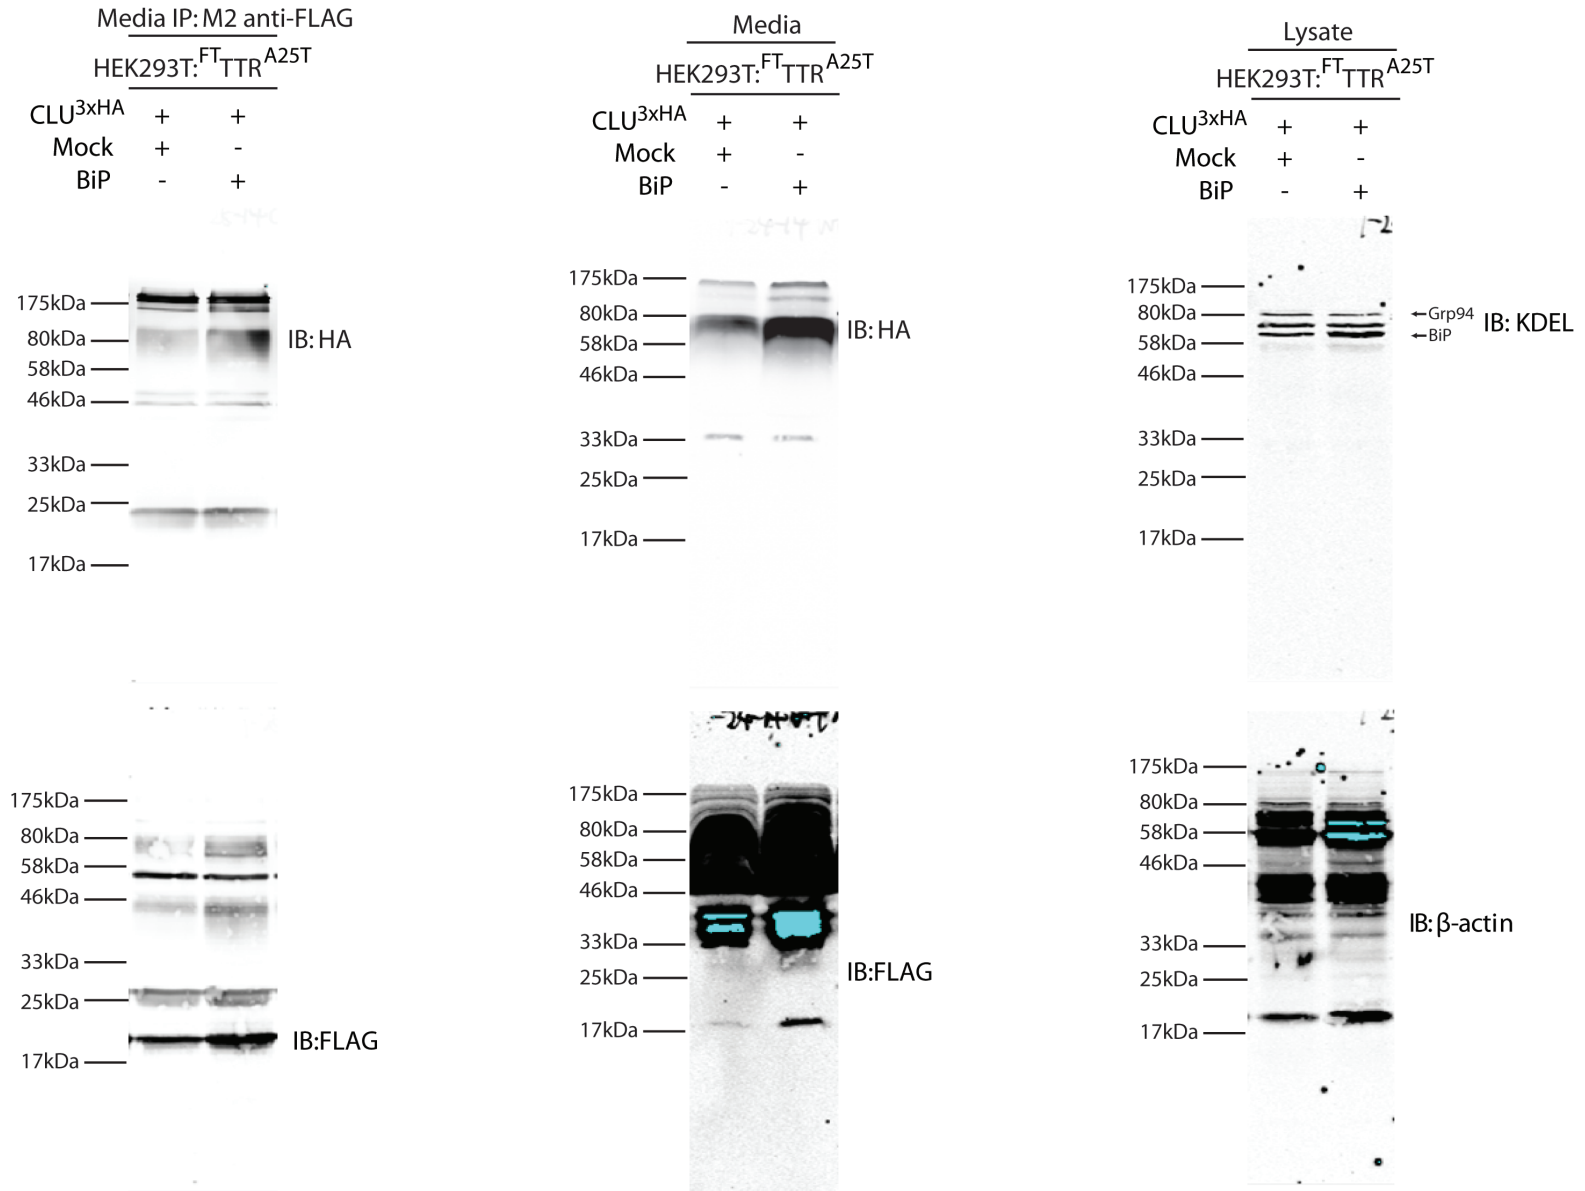

Supplement: embj0034-0004-sd7.pdf [file embj0034-0004-sd7.pdf]

**Figure 1A**

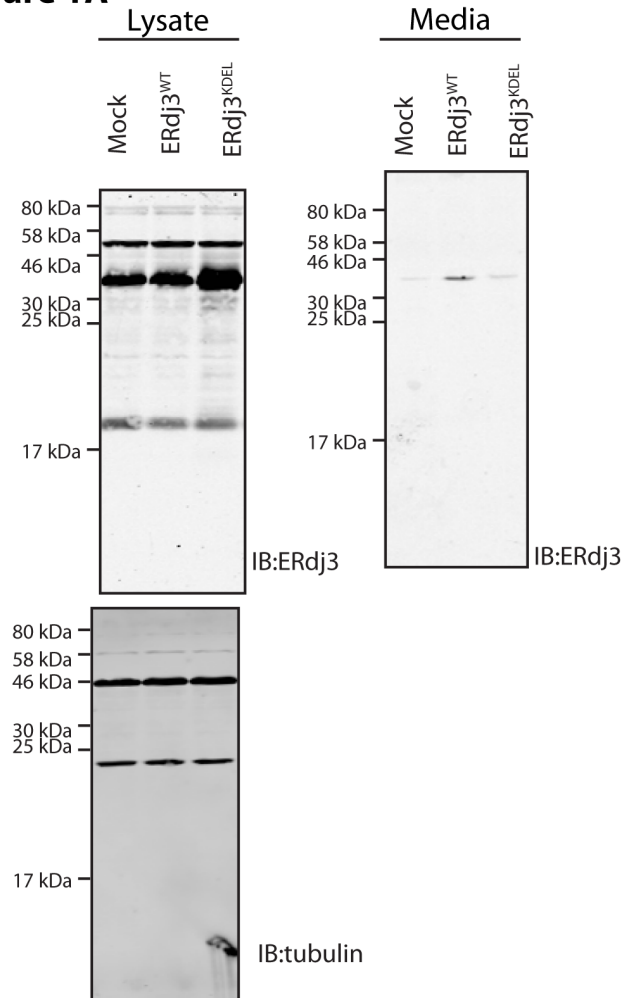

Figure 1C

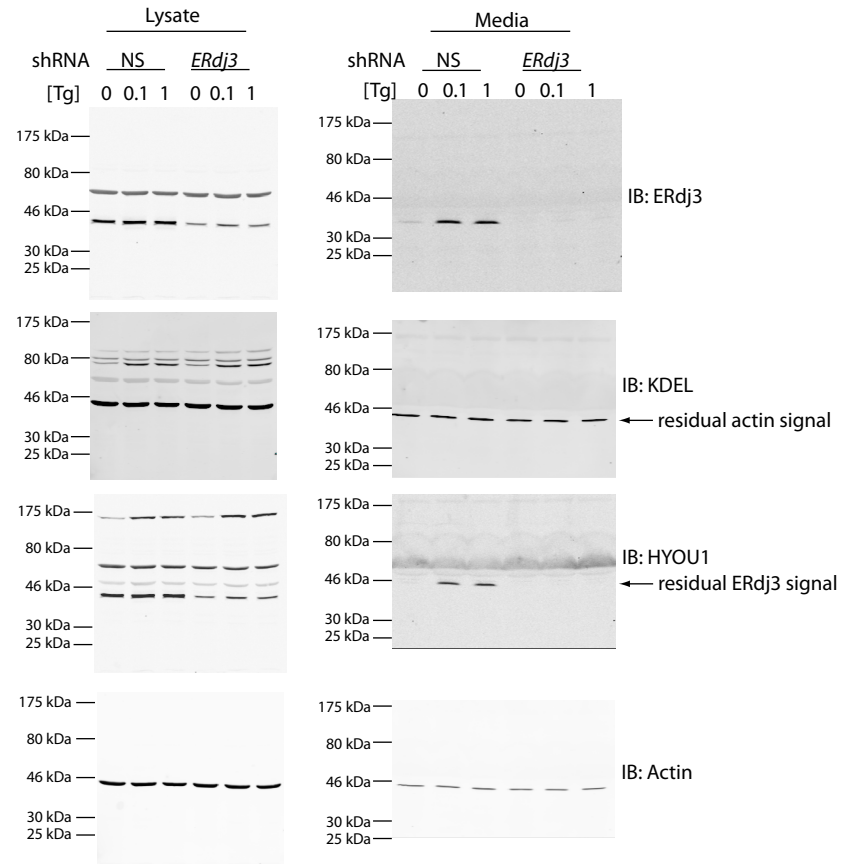

Figure 1E

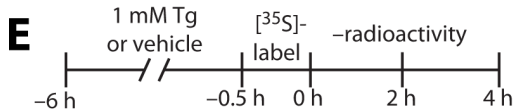

| Huh7     |   |   |     |   |   |     |   |   |     |   |   |
|----------|---|---|-----|---|---|-----|---|---|-----|---|---|
| vehicle  |   |   |     |   |   | Tg  |   |   |     |   |   |
| lys      |   |   | med |   |   | lys |   |   | med |   |   |
| Chase(h) |   |   |     |   |   |     |   |   |     |   |   |
| 0        | 2 | 4 | 0   | 2 | 4 | 0   | 2 | 4 | 0   | 2 | 4 |

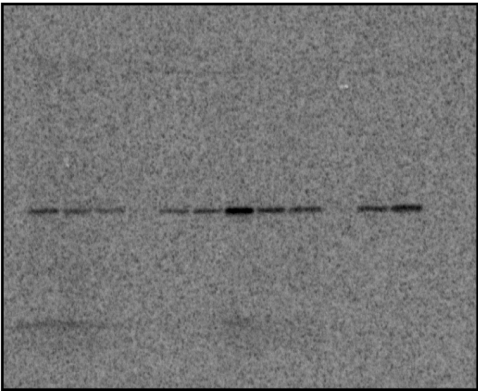

<sup>35</sup>S; IP:ERdj3

Figure 1H

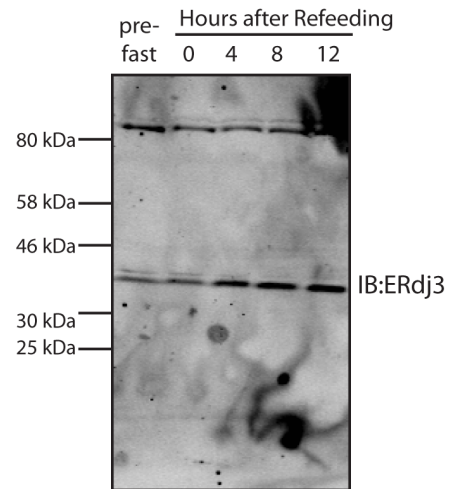

Supplement: embj0034-0004-sd9.pdf [file embj0034-0004-sd9.pdf]
